# Supplementary material
Source: PubMed Central journal article supplement (PMC4959475)
Supplement: AEM.03965-15_zam999117079so1.pdf [file AEM.03965-15_zam999117079so1.pdf]

# Supporting Information Appendix

Doruk Beyter<sup>1</sup>, Pei-Zhong Tang<sup>2</sup>, Scott Becker<sup>2</sup>, Tony Hoang<sup>3</sup>, Damla Bilgin<sup>3</sup>, Yan Wei Lim<sup>4</sup>, Todd C. Peterson<sup>2</sup>, Stephen Mayfield<sup>5</sup>, Farzad Haerizadeh<sup>2</sup>, Jonathan B. Shurin<sup>6</sup>, Vineet Bafna<sup>1</sup>, and Robert McBride<sup>3</sup>

<sup>1</sup>Computer Science and Engineering Department, University of California San Diego

<sup>2</sup>Life Technologies

<sup>3</sup>Sapphire Energy

<sup>4</sup>Biology Department, San Diego State University

<sup>5</sup>Division of Biological Sciences, University of California San Diego

<sup>6</sup>Section of Ecology, Behavior and Evolution, University of California San Diego

February 3, 2016

## Contents

|          |                                                                                                              |          |
|----------|--------------------------------------------------------------------------------------------------------------|----------|
| <b>1</b> | <b>Supplementary Methods</b>                                                                                 | <b>2</b> |
| 1.1      | DNA preparation . . . . .                                                                                    | 2        |
| 1.2      | TMAP usage . . . . .                                                                                         | 2        |
| 1.3      | OTU-based analysis for 16S data . . . . .                                                                    | 3        |
| 1.4      | Comparison of sequence mapping and OTU-based approaches and reproducibility assessment among chips . . . . . | 3        |
| 1.5      | Challenges in OTU-based approaches and taxonomy assignment on ITS2 data . . . . .                            | 3        |
| 1.6      | Outlier removal on time series ecosystem data . . . . .                                                      | 4        |
| 1.7      | Model comparison using F-test . . . . .                                                                      | 4        |
| <b>2</b> | <b>Supplementary Results</b>                                                                                 | <b>4</b> |
| 2.1      | Mapping statistics . . . . .                                                                                 | 4        |
| 2.2      | Intra-sample reproducibility assessment . . . . .                                                            | 5        |
| 2.3      | Pre- and post-fungicide relationship of productivity variability and temperature . . . . .                   | 5        |

## List of Figures

|    |                      |    |
|----|----------------------|----|
| 1  | Figure S1 . . . . .  | 7  |
| 2  | Figure S2 . . . . .  | 8  |
| 3  | Figure S3 . . . . .  | 9  |
| 4  | Figure S4 . . . . .  | 12 |
| 5  | Figure S5 . . . . .  | 16 |
| 6  | Figure S6 . . . . .  | 17 |
| 7  | Figure S7 . . . . .  | 19 |
| 8  | Figure S8 . . . . .  | 21 |
| 9  | Figure S9 . . . . .  | 23 |
| 10 | Figure S10 . . . . . | 24 |

|    |                      |    |
|----|----------------------|----|
| 11 | Figure S11 . . . . . | 26 |
| 12 | Figure S12 . . . . . | 26 |
| 13 | Figure S13 . . . . . | 27 |
| 14 | Figure S14 . . . . . | 28 |
| 15 | Figure S15 . . . . . | 30 |
| 16 | Figure S16 . . . . . | 30 |
| 17 | Figure S17 . . . . . | 31 |
| 18 | Figure S18 . . . . . | 32 |
| 19 | Figure S19 . . . . . | 33 |
| 20 | Figure S20 . . . . . | 34 |
| 21 | Figure S21 . . . . . | 34 |
| 22 | Figure S22 . . . . . | 35 |

## List of Tables

# 1 Supplementary Methods

## 1.1 DNA preparation

Each 50 ml biological sample was thawed, homogenized, and two 15ml subsamples withdrawn from the original sample and placed in 15ml tubes. These were centrifuged at 3500rpm for 20 minutes. The supernatant from each sample was combined and transferred to a 50mL tube. This was then concentrated using Amicon Ultra Centrifugal Filters (EMD Milipore, 2015). 15 mL of supernatant was added to Amicon Ultra Centrifugal Filters. These were centrifuged at max (3750rpm) for 1 hour. The liquid was disposed. The remaining supernatant was added to the filter which was again centrifuged at max (3750rpm) for 1 hour. 200 $\mu$ L from the top of the filter was transferred into a new centrifuge tube and stored. This liquid was then added to the pellet from the original centrifuge and DNA extracted using the PowerLyser PowerSoil DNA isolation Kit (Mo Bio Laboratories Inc., 2015).

The DNA from the extraction was amplified using primers designed to target both the V4 region of 16S rRNA gene and the ITS2 region of prokaryotic and eukaryotic genomes. Primers were ordered with with 5' PHO modifications to ensure compatibility with labeling for the sequencing steps. The amplicon for the 16S should fall approximately between the 100-400bp range and the primers were designed to universally target Archea and Bacteria (Forward: S-D-Bact-0564-a-S-15 (41345) AYTGGGYDTAAAGNG, Reverse: S-D-Bact-0785-b-A-18 (41346) TACNVGGGTATCTAATCC). The amplicon for the ITS2 primer should fall approximately between 200-400bp and were selected because they universally target eukaryotes (Forward: (41343) GCATCGATGAAGAACGCAGC, Reverse: (41344) TCCTCCGCTTATTGATATGC).

The PCR was set up in a 96 well plate as follows: 20.0 $\mu$ L 5X HF buffer (Phusion kit), 4.0 $\mu$ L 10 mM dNTPs (NEB), 4.0 $\mu$ L DMSO (Phusion kit), 10.0 $\mu$ L 5M Betaine, 5.0 $\mu$ L 10 $\mu$ M of each primer, 0.8 $\mu$ L Phusion polymerase, 6.0 $\mu$ L DNA template. To cover the diversity represented gradient PCR was performed with the following PCR protocol: 98°C 0:30, 25X (98°C 0:10, 43°C-53°C 0:30, 72°C 0:30), 72°C 5:00, 4°C hold. Gels were run to ensure correct band sizes. The DNA was then pooled and cleaned using Invitrogen PureLink Pro 96 PCR purification Kit (Life Technologies, 2015). The resultant DNA was then quantified to ensure 2 micrograms and prepped for sequencing.

## 1.2 TMAP usage

We applied the “map2” algorithm (based off of the BWA long-read algorithm [4]), designed for reads longer than 150bps, due to the read sizes (a mean of 240bps for 16S and 420 for ITS2 sequences – see Figures S4, S5, and S6 for read length distributions in all chips and samples; individually, and all combined) and other default parameters associated with it. For every read, TMAP returns the mapping with the best score. If multiple sequences had the same best score, a random mapping among them was returned.

### 1.3 OTU-based analysis for 16S data

Several OTU-based pipelines such as UPARSE [5], QIIME [6], MOTHUR [7] have been developed for the analysis of Illumina or 454 pyrosequencing 16S and fungal only ITS2 marker-gene sequencing data. Very recently, a pipeline that includes 16S Ion Torrent PGM sequencing is developed [8], and used it in the Brazilian Microbiome Project (BMP) [9]. The BMP 16S profiling analysis pipeline makes use of the UPARSE OTU clustering, and QIIME taxonomy assignment, using Ribosomal Database Project (RDP) naive classifier [10].

In order to compare our 16S data analysis results with OTU-based pipelines, we used the pipeline suggested by BMP. We began by truncating the reads at length 200 as the read ends are assumed to have lowered quality, and discarded any read with a smaller length. We then removed any read having an expected error rate of 1.0, a suggested value in the UPARSE documentation [11]. We applied dereplication that removes the identical reads for faster querying, and removed any singleton reads. We clustered the OTUs, and applied a reference based chimera filtering using a gold database, which contains the ChimeraSlayer reference database from the Broad Microbiome Utilities version microbiomeutil-r20110519, as described in [12], using the plus strand, as specified. We finally assigned all quality filtered reads, including the singletons, to the constructed OTUs at 97% identity. All analysis until this point was performed using usearch v7.0.1090.i86linux32. We gathered the taxonomy information using assign\_taxonomy.py version 1.7.0 from QIIME, choosing RDP classifier as taxonomy assignment algorithm with the default bootstrap confidence threshold of 80%, and OTUs pre-constructed from GreenGenes (version May 2013) at 97% identity, as training sequences.

### 1.4 Comparison of sequence mapping and OTU-based approaches and reproducibility assessment among chips

We performed a Mantel test between the sample taxonomy composition results of our approach and the BMP pipeline for 16S data analysis as follows: at ranks phylum, class, order, family and genus, respectively we obtained the taxonomies of both analysis results. We took the union of the taxonomies observed in the two analyses, and assigned abundance values of 0 to any taxonomy in the union set not observed in individual results, for all 26 time point samples. Thus, for each approach, we had pairs of relative abundance values for all taxonomies in the union set at all time points as a matrix, which we called a *taxonomy abundance matrix*, for each of the aforementioned rank. We compared these pairs of taxonomy abundance matrices using the package “ade4” [13] in R with the function “mantel.rtest” using 999 replicates. We achieved Mantel r statistics of 0.99, 0.98, 0.94, 0.94, 0.91 for ranks phylum, class, order, family, and genus, respectively, all with p-value 0.001, suggesting high result similarity. Since the RDP classifier is not capable in classification beyond the genus level, we have no comparison available with the BMP pipeline at species/sequence level of resolution. BMP pipeline area plots at ranks phylum, class, and genus are shown in Figure S14, for visual comparison purposes.

We also note that a 16S genus level diversity comparison between the two approaches yield a nearly identical pattern: the linear regression describing the relationship between the two was:  $r^2 = 0.96$ ,  $P = 2.60 \cdot 10^{-14}$ .

The reproducibility assessment among chips for 16S and ITS2 data also follows the same Mantel test approach, with the single difference of containing the top 2000 and 200 sequence relative abundances (instead of taxa relative abundances) in the compared pairs of abundance matrices coming from different chips.

### 1.5 Challenges in OTU-based approaches and taxonomy assignment on ITS2 data

Given the high variance in the ITS2 region length, ranging from 100bps to 700bps [14]; length trimming, a critically important step in an OTU-based approach [11], is not practical. Moreover, the taxon dependent OTU clustering identity percentages on microbial eukaryotes [15], may render the OTU clustering step erroneous. The taxon dependency of OTU clustering identity percentages also makes the RDP naive

Bayesian classifier taxonomy assignment (used in OTU-based approach) challenging, as its reference taxonomy database is expected to be clustered at a certain identity percentage. Another challenge in constructing a clustered ITS2 database from NCBI would lie in determining the correct boundaries of the ITS2 region, previous to clustering, due to the flanking 18S, ITS1, 5.8S, and 28S regions in the NCBI nucleotide entries. Previous research [16] reports that taxonomy classification results using BLASTN, a mapping based approach, and RDP naive Bayesian classifier are very similar on ITS2 data. Considering these challenges and findings, we preferred to determine the taxa relative abundances using a mapping approach.

## 1.6 Outlier removal on time series ecosystem data

We initially subtracted the 7-day local central mean from each data point. We performed this step in order to reduce the dependency between successive points in our time series ecosystem data and to satisfy the independent, identicaly distribution requirement for a normal distribution. We, then, tested for normality using “shapiro.test” in R, using the package “stats” [17]. Upon confirming for normality, we removed any data point that exceeded  $3\sigma$  of distance from mean. We did not perform outlier detection for  $\text{NH}_4$ , urea,  $\text{NO}_3$ ,  $\text{NO}_2$ , and  $\text{PO}_4$ , due to the expected high fluctuations stemming from pond nutrient management.

## 1.7 Model comparison using F-test

In order to explore the explanatory values of certain factors on a target, controlling for other factor(s), we compared two models: a reduced and a full model. The reduced model contains the factor we would like to control for, whereas the full model contains additional factor(s), which we are interested to explore the effect on our target.

$$\begin{array}{l} \text{Reduced Model } y = \beta_0 + \beta_1 x_1 + \dots + \beta_k x_k + \varepsilon_r \\ \text{Full Model } y = \beta_0 + \beta_1 x_1 + \dots + \beta_k x_k + \beta_{k+1} x_{k+1} + \dots + \beta_p x_p + \varepsilon_f \end{array} \quad (1)$$

where in one our tests, for instance,  $y$  was chosen as the eukaryotic diversity we were targeting,  $x_1, \dots, x_k$  as the factors we controlled for such as temperature and bacteria diversity, and  $x_{k+1}, \dots, x_p$  as any factor(s) we explored the effect it had on the target, such as pre- and post-pesticide sampling. We tested if we could reject the null hypothesis:

$$H_0 : \beta_{k+1} = \dots = \beta_p = 0$$

to see if our full model added a significant explanatory value over the reduced model, using an F statistic:

$$F = \frac{(RSS_{reduced} - RSS_{full}) / (p - k)}{RSS_{full} / (n - p - 1)} \quad (2)$$

where  $RSS_i$  is the residual sum of squares of model  $i$ .

## 2 Supplementary Results

### 2.1 Mapping statistics

We initially discarded any read having length shorter than 50 nucleotides, and an error rate higher than 2.0 for 16S reads, and 4.0 for ITS reads, due to their longer average size compared to 16S. After mapping the remaining 16S and ITS2 reads to respective databases, we calculated percent identity, and *query-coverage*, defined as the fraction of the query sequence matching to the target, for assessing mapping quality. For these measures, the quality was uniformly high with a mean percent identity of 97% and 96%, and mean coverage over 94% and 82% across all 16S and ITS2 reads that mapped their respective database. (Figures S7 and S8). Following the cutoffs applied by “16S Ribosomal RNA Reference Sequence Similarity Search”

by NCBI [18], we used a 95% percent identity and 70% of query-coverage cutoff. On average among all chips, 75% of the 16S and 77% of the ITS2 reads exceeded our chosen cut-offs, and were used in subsequent analyses.

## 2.2 Intra-sample reproducibility assessment

In order to assess robustness in the sample composition analyses, two redundant samples were used as technical replicates for each of samples 4, 11, 19 and 24, in the design (samples 27 and 31 were replicates of sample 4, 28 and 32 for 11, 29 and 33 for 19, and 30 and 34 for 24). Figure S9 demonstrates that the technical replicates consistently show low dissimilarity values (mean Bray Curtis dissimilarity values of 0.06, 0.03, 0.04, 0.02 and 0.04, 0.07, 0.50, 0.06, for the two replicates of samples 4, 11, 19 and 24 for 16S and ITS2, chip 3.) suggesting good reproducibility, except sample 19 for ITS2 data only. We note the replicates for sample 19 (samples 29 and 33, ITS2 data) had a skewed read length distribution, compared to sample 19 itself, (see Figure S5b), which might be a possible reason for the observed noise.

## 2.3 Pre- and post-fungicide relationship of productivity variability and temperature

We investigated whether temperature, based on its pre-fungicide era relationship with productivity variability (standard deviation), could predict the post-fungicide productivity standard deviation (sd) trends. Figure S17 shows linear relationship between temperature and productivity sd in different periods. During the pre-fungicide period, temperature showed a positive correlation with productivity sd, whereas it had a negative correlation during the post-fungicide period, therefore temperature alone cannot explain the change in the productivity variability observed after the fungicide application.

## References

- [1] EMD Milipore. UFC903008 — Amicon Ultra-15 Centrifugal Filter Unit with Ultracel-30 membrane. Available at: <http://www.millipore.com/catalogue/item/ufc903008>, 2015. Last Accessed: 01 April 2015.
- [2] Mo Bio Laboratories Inc. Powerlyzer Powersoil DNA Isolation Kit. Available at: <http://www.mobio.com/soil-dna-isolation/powerlyzer-powersoil-dna-isolation-kit.html>, 2015. Last Accessed: 01 April 2015.
- [3] Life Technologies. Purelink Pro 96 PCR Purification Kit. Available at: <http://products.invitrogen.com/ivgn/product/K310096A>, 2015. Last Accessed: 01 April 2015.
- [4] Heng Li and Richard Durbin. Fast and accurate long-read alignment with burrows-wheeler transform. *Bioinformatics*, 26(5):589–595, 2010.
- [5] Robert C Edgar. Uparse: highly accurate otu sequences from microbial amplicon reads. *Nature methods*, 10(10):996–998, 2013.
- [6] J Gregory Caporaso, Justin Kuczynski, Jesse Stombaugh, Kyle Bittinger, Frederic D Bushman, Elizabeth K Costello, Noah Fierer, Antonio Gonzalez Pena, Julia K Goodrich, Jeffrey I Gordon, et al. Qiime allows analysis of high-throughput community sequencing data. *Nature methods*, 7(5):335–336, 2010.
- [7] Patrick D Schloss, Sarah L Westcott, Thomas Ryabin, Justine R Hall, Martin Hartmann, Emily B Hollister, Ryan A Lesniewski, Brian B Oakley, Donovan H Parks, Courtney J Robinson, et al. Introducing mothur: open-source, platform-independent, community-supported software for describing and comparing microbial communities. *Applied and environmental microbiology*, 75(23):7537–7541, 2009.

- [8] Victor S Pylro, Luiz Fernando W Roesch, Daniel K Morais, Ian M Clark, Penny R Hirsch, and Marcos R Tótola. Data analysis for 16s microbial profiling from different benchtop sequencing platforms. *Journal of microbiological methods*, 107:30–37, 2014.
- [9] Victor Satler Pylro. Brazilian Microbiome Project. Available at: <http://www.brmicrobiome.org>, 2015. Last Accessed: 01 April 2015.
- [10] Qiong Wang, George M Garrity, James M Tiedje, and James R Cole. Naive bayesian classifier for rapid assignment of rrna sequences into the new bacterial taxonomy. *Applied and environmental microbiology*, 73(16):5261–5267, 2007.
- [11] Robert C Edgar. UPARSE Pipeline. Available at: [http://drive5.com/usearch/manual/uparse\\_pipeline.html](http://drive5.com/usearch/manual/uparse_pipeline.html), 2015. Last Accessed: 01 April 2015.
- [12] Robert C Edgar. UCHIME. Available at: [http://drive5.com/uchime/uchime\\_download.html](http://drive5.com/uchime/uchime_download.html), 2015. Last Accessed: 01 April 2015.
- [13] S. Dray and A.B. Dufour. The ade4 package: implementing the duality diagram for ecologists. *Journal of Statistical Software*, 22(4):1–20, 2007.
- [14] Hui Yao, Jingyuan Song, Chang Liu, Kun Luo, Jianping Han, Ying Li, Xiaohui Pang, Hongxi Xu, Yingjie Zhu, Peigen Xiao, et al. Use of its2 region as the universal dna barcode for plants and animals. *PloS one*, 5(10):e13102, 2010.
- [15] Jean-David Grattepanche, Luciana F Santoferrara, George B McManus, and Laura A Katz. Diversity of diversity: conceptual and methodological differences in biodiversity estimates of eukaryotic microbes as compared to bacteria. *Trends in microbiology*, 22(8):432–437, 2014.
- [16] Andrea Porrás-Alfaro, Kuan-Liang Liu, Cheryl R Kuske, and Gary Xie. From genus to phylum: large-subunit and internal transcribed spacer rrna operon regions show similar classification accuracies influenced by database composition. *Applied and environmental microbiology*, 80(3):829–840, 2014.
- [17] R Core Team. *R: A Language and Environment for Statistical Computing*. R Foundation for Statistical Computing, Vienna, Austria, 2014.
- [18] NCBI. Available at: <http://www.ncbi.nlm.nih.gov/genomes/16S/help.html#query>, 2015. Last Accessed: 12 July 2015.

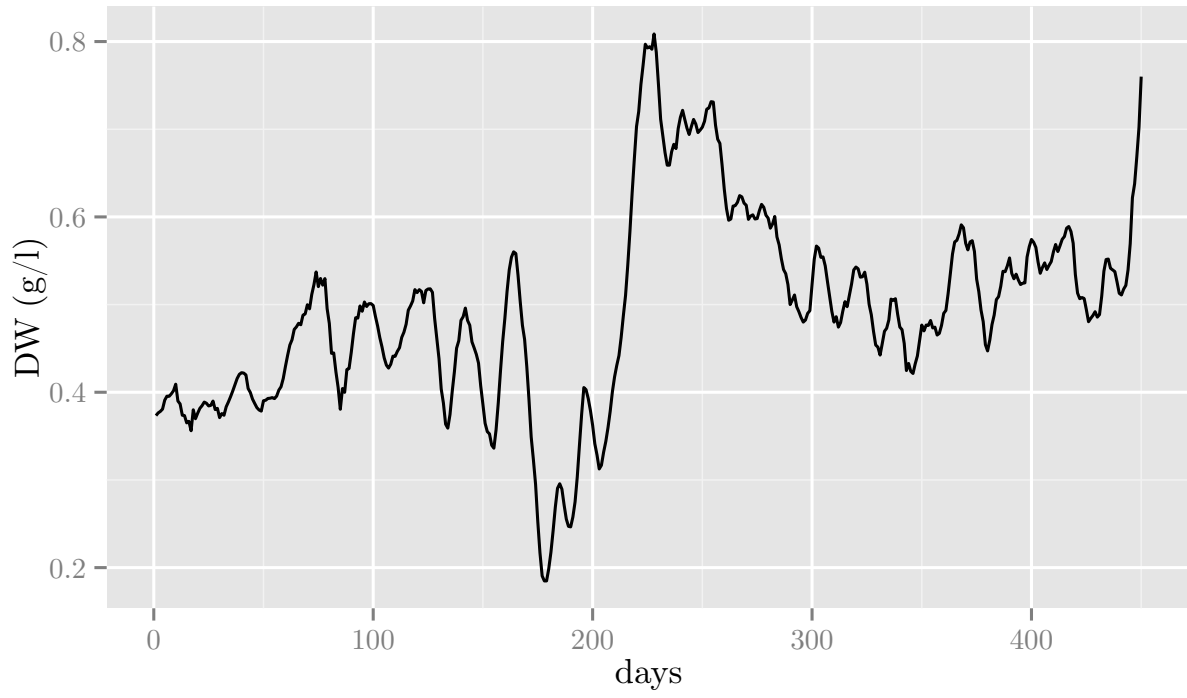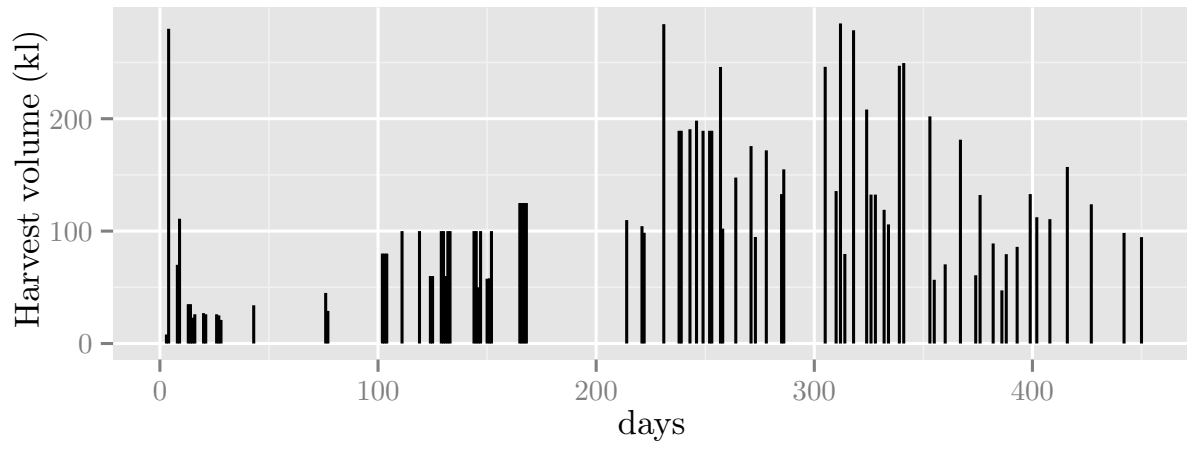

**Figure 1:** DW (g/l) and harvest volume (kl) in time.

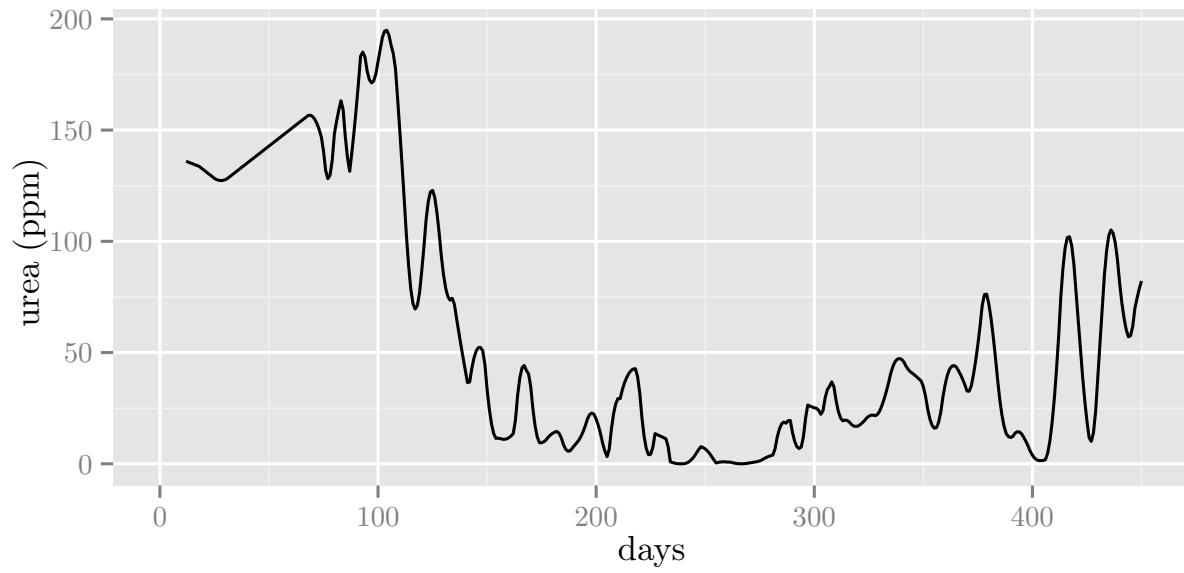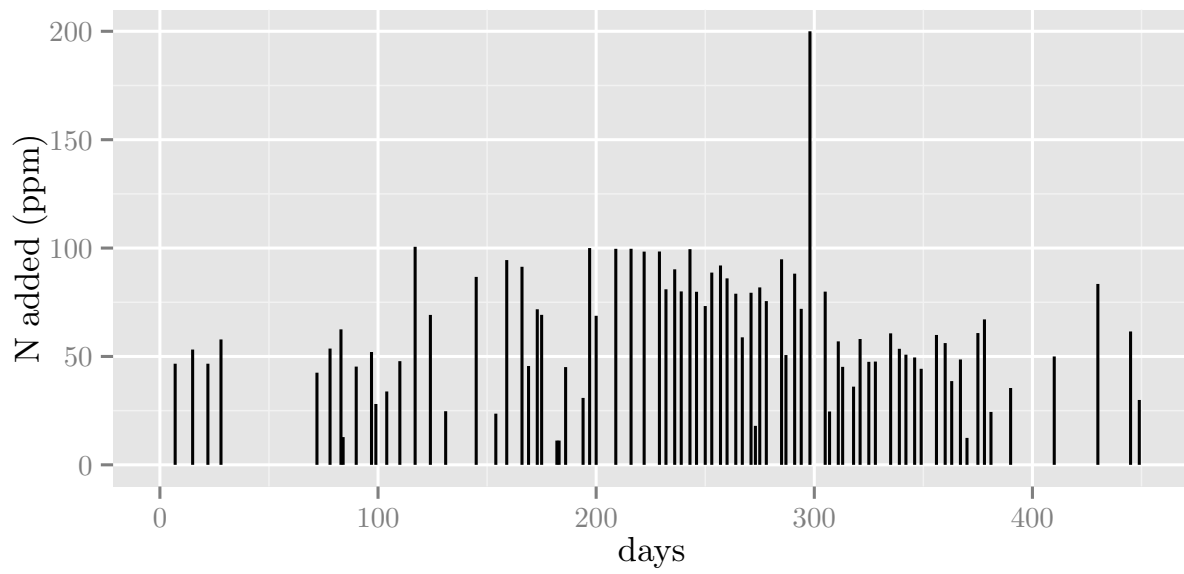

**Figure 2:** Measured urea levels and N addition (mostly through urea addition) data.



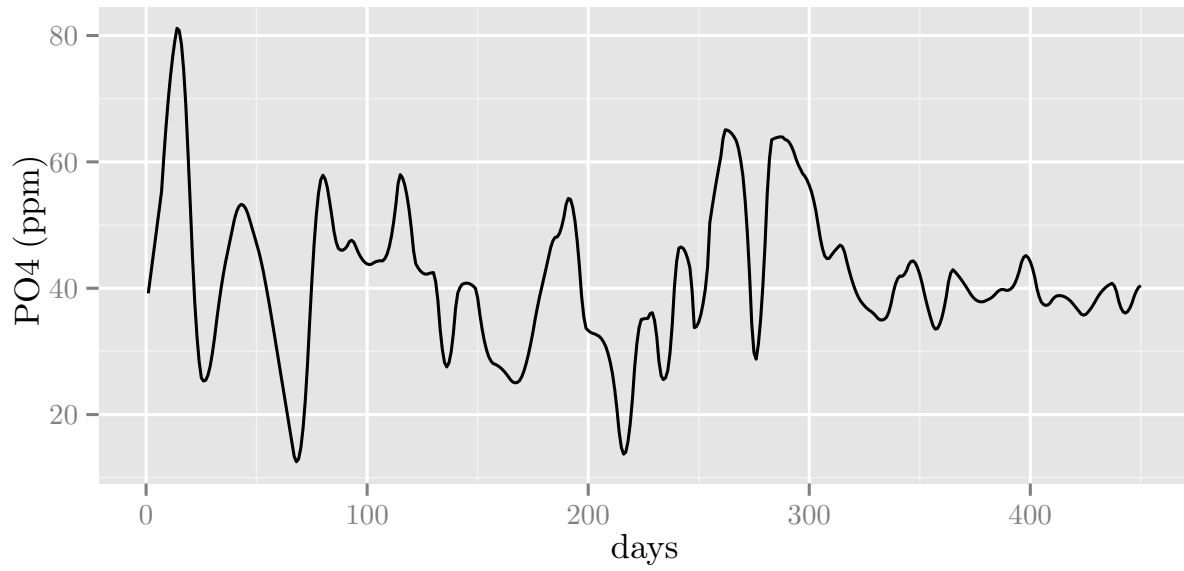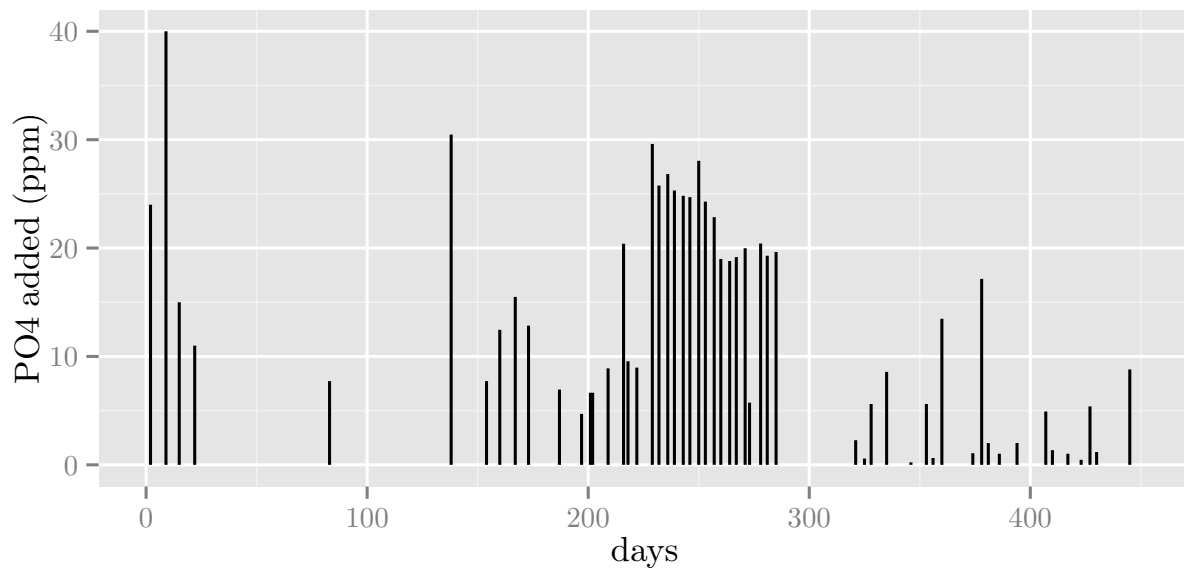

**Figure 3:** Measured PO4 levels and PO4 addition data.

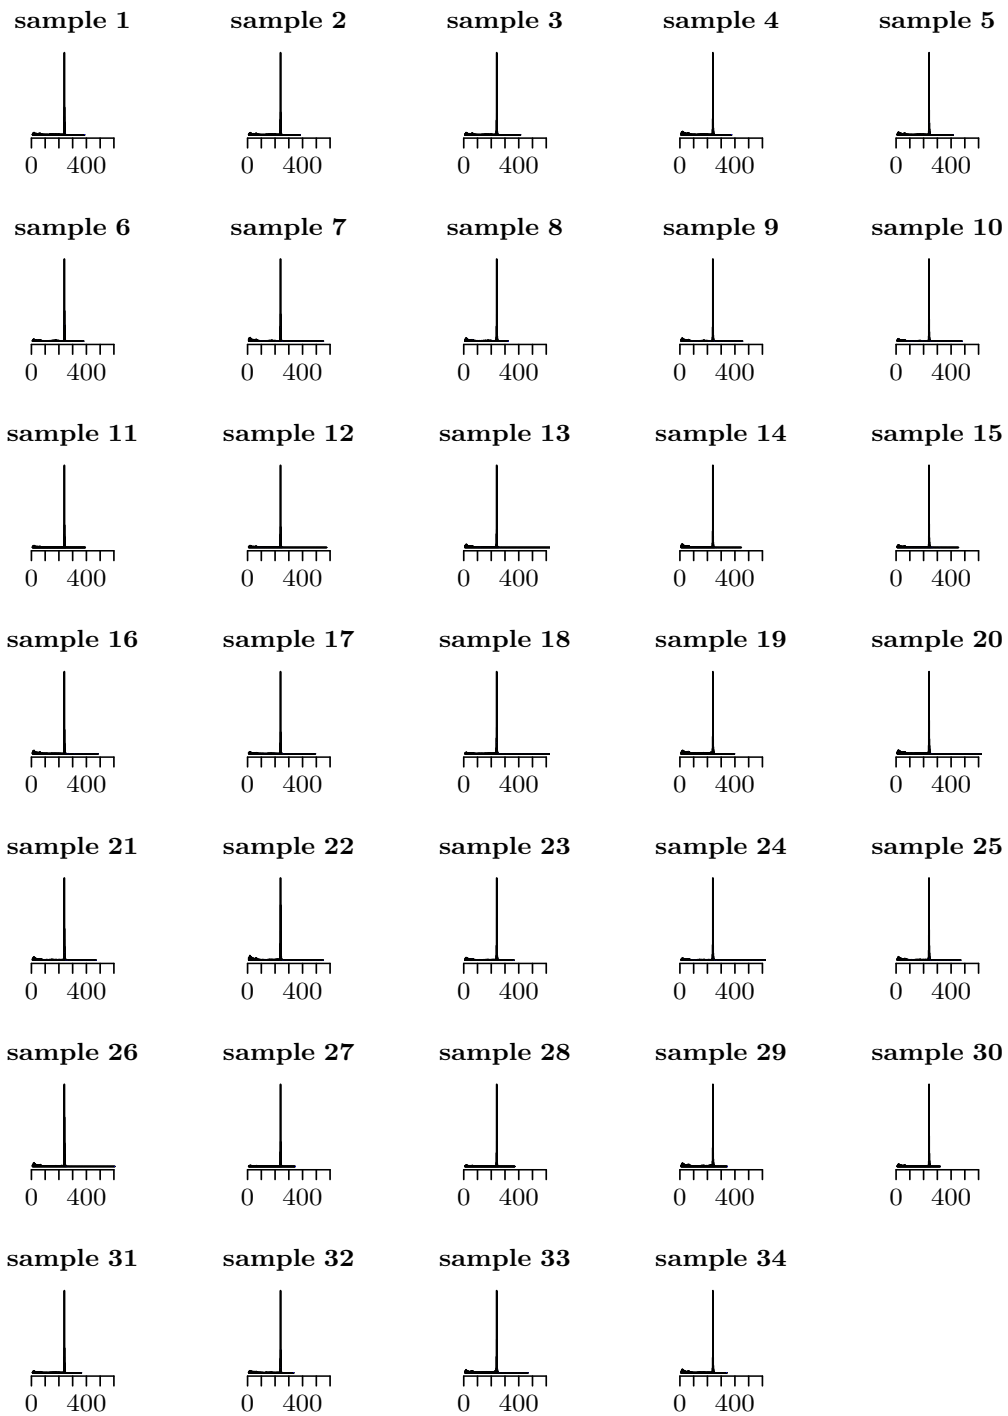

Figure 4a

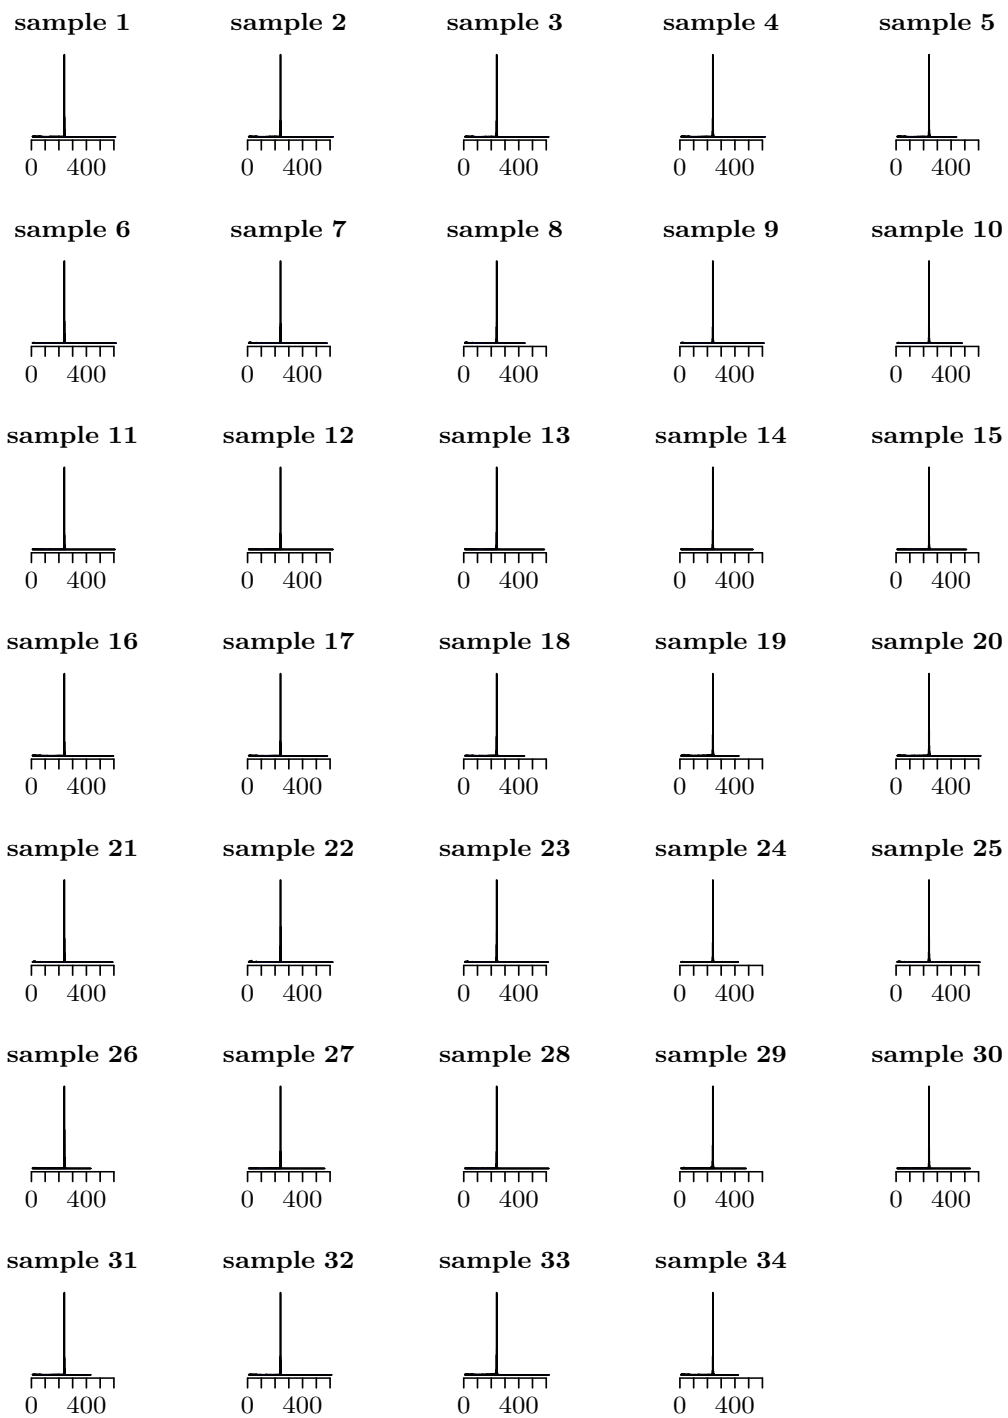

Figure 4b

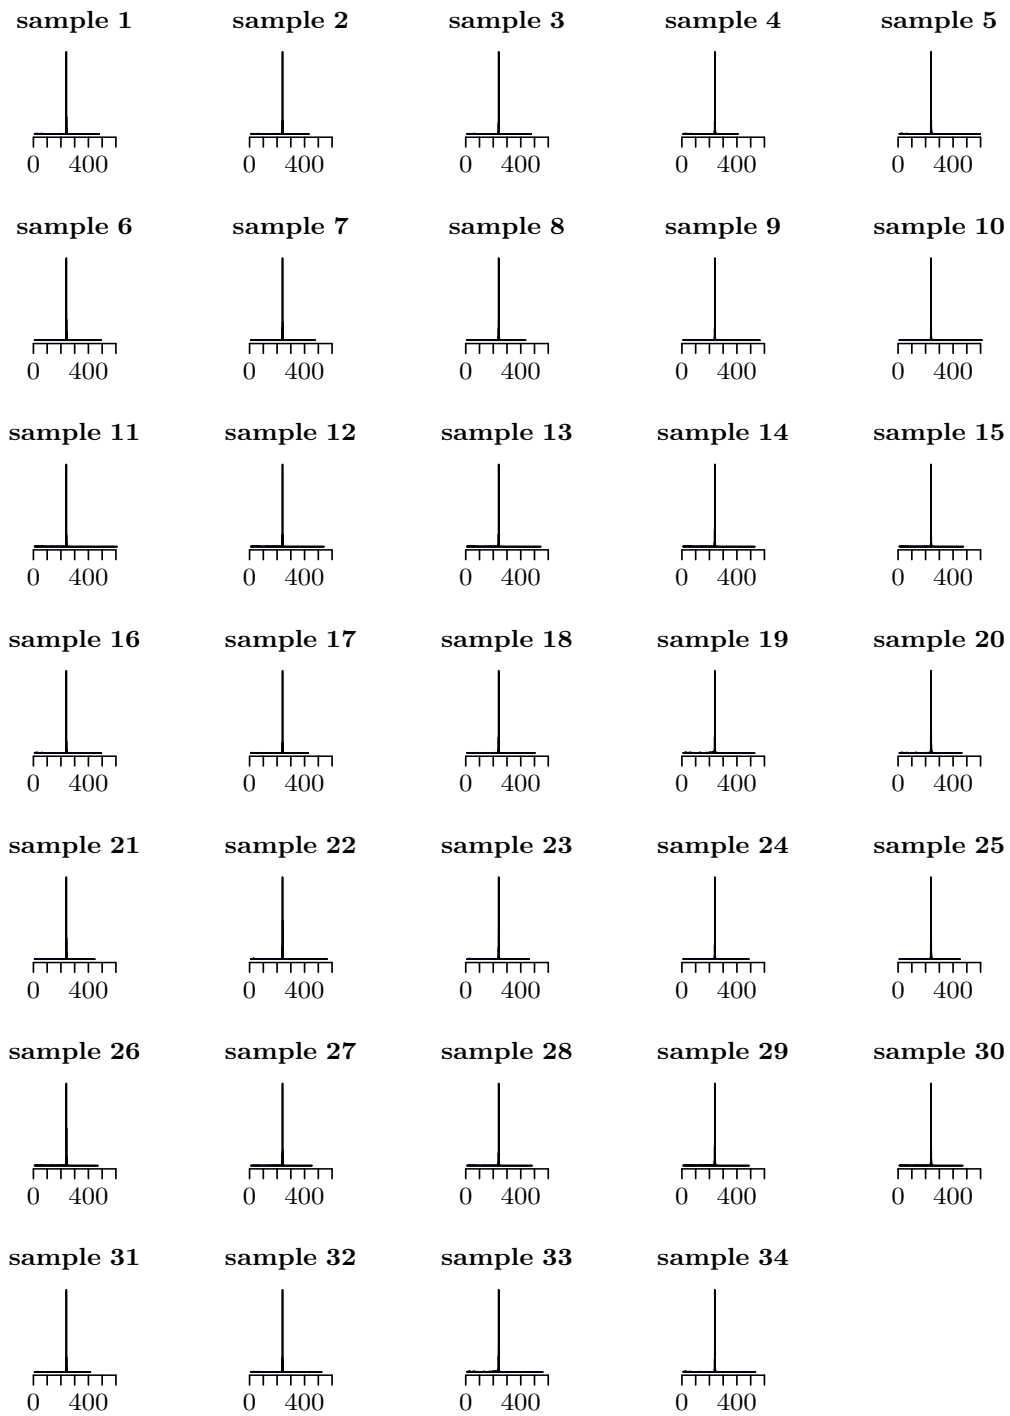

Figure 4c

Figure 4: Read length distribution for 16S data, chips 1 (4a), 2 (4b), 3 (4c).

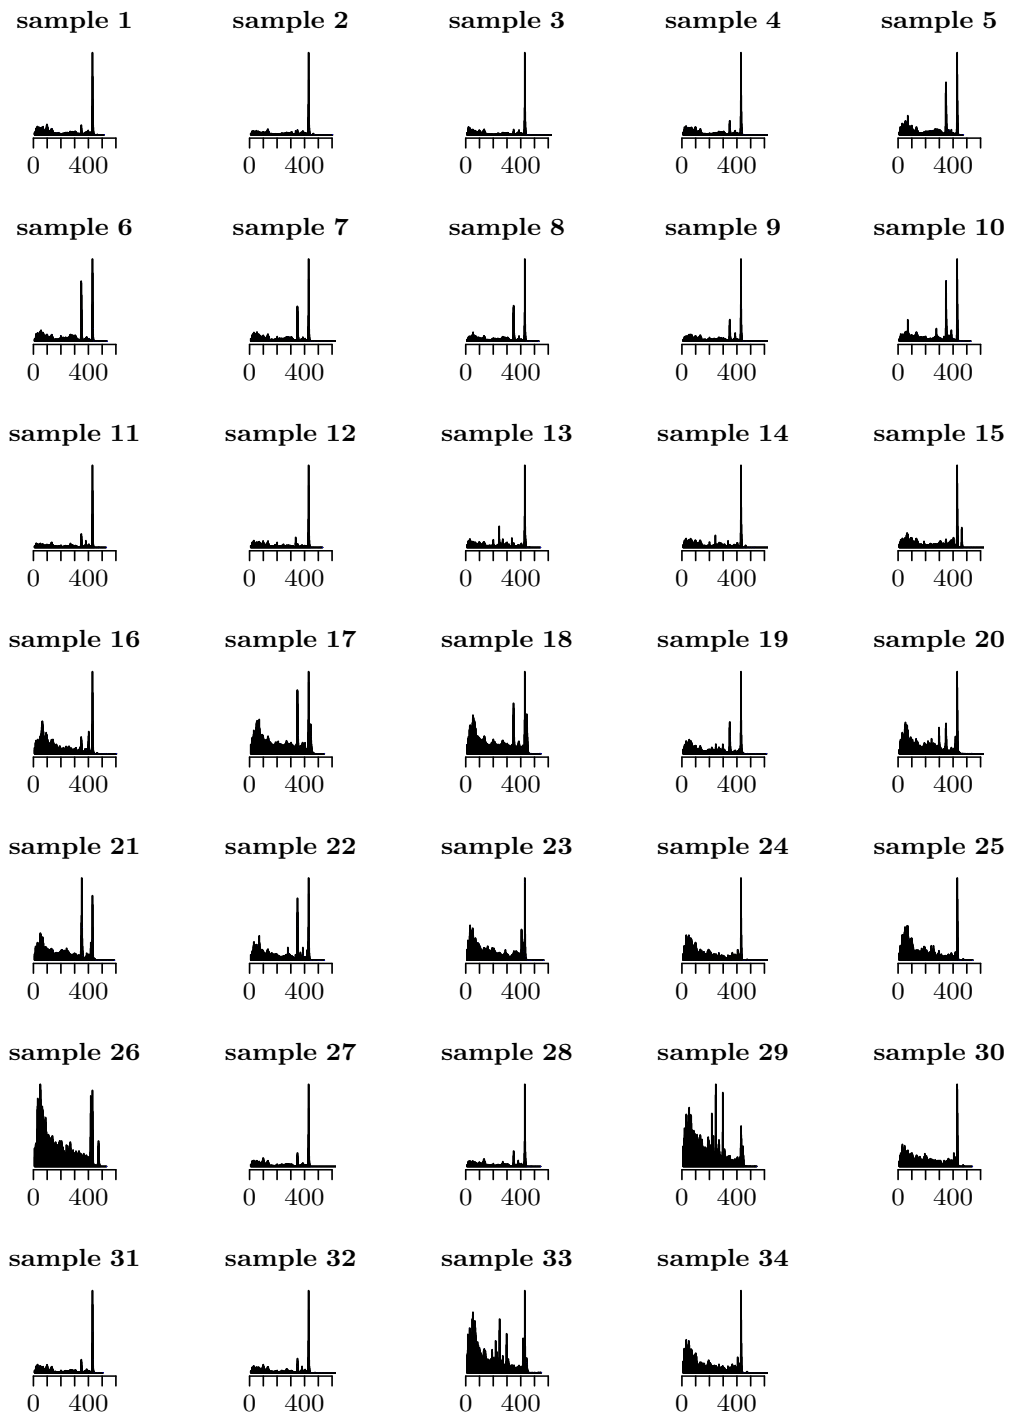

Figure 5a

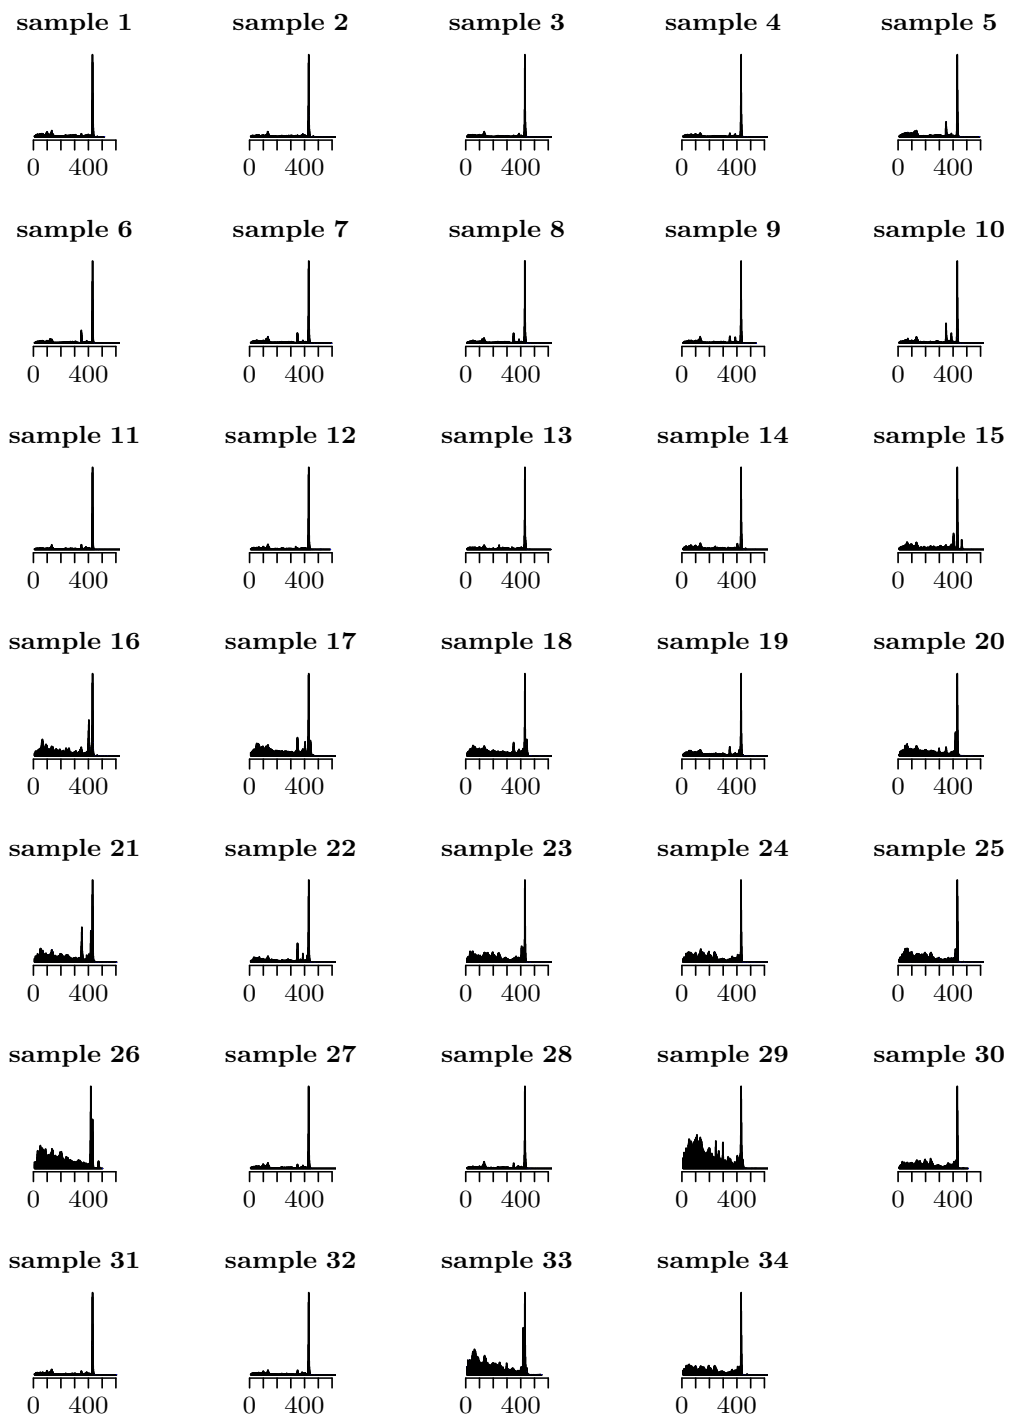

Figure 5b

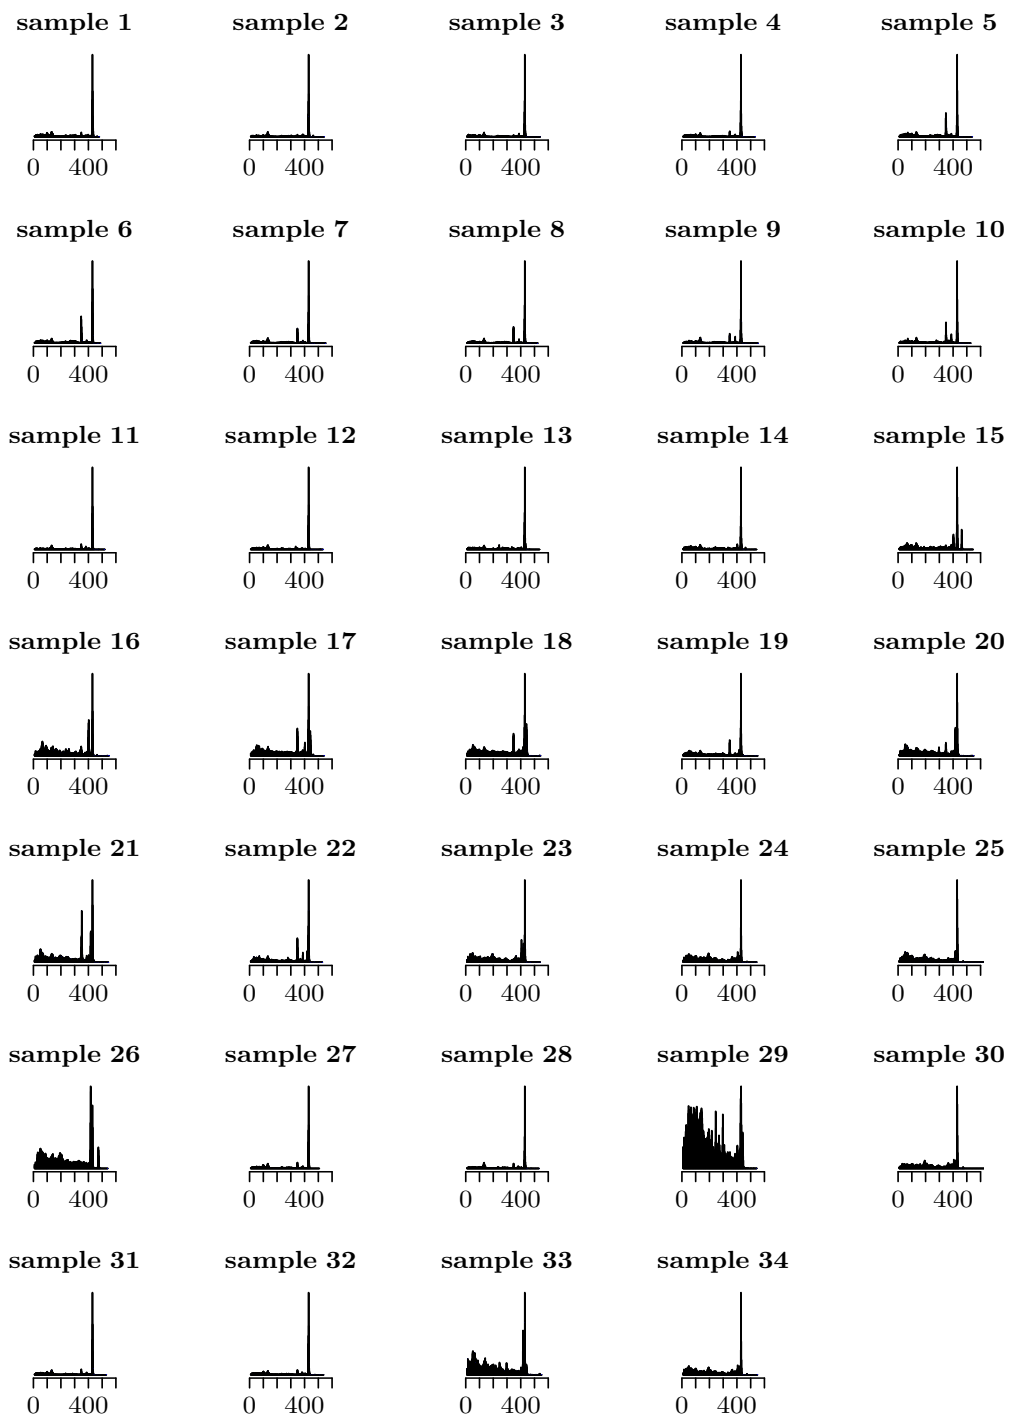

Figure 5c

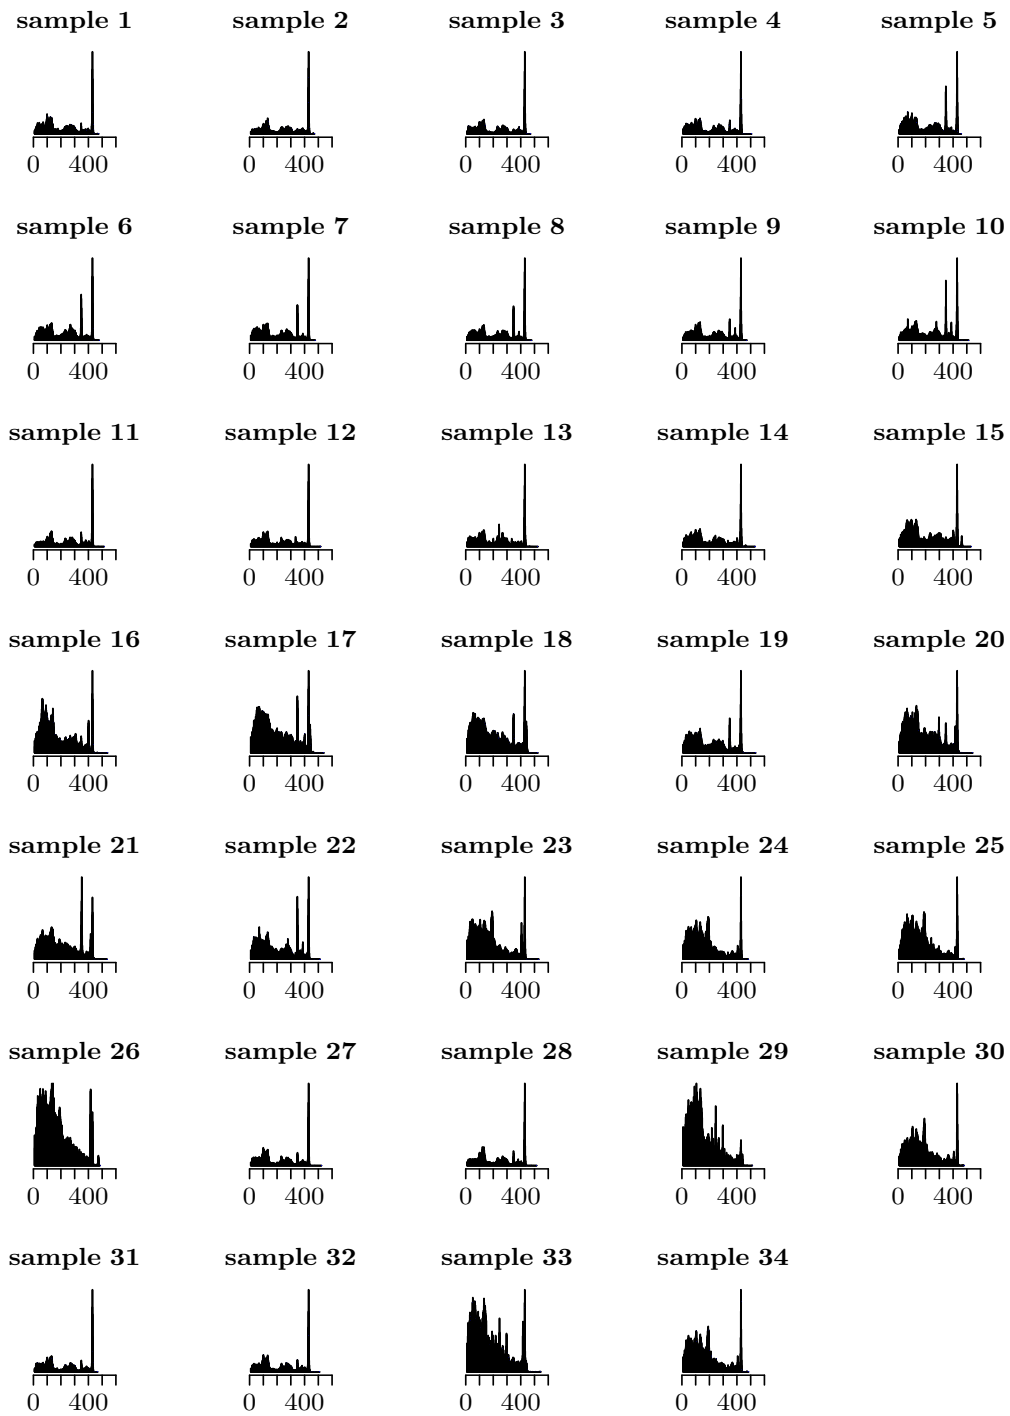

Figure 5d

Figure 5: Read length distribution for ITS2 data, chips 2 (5a), 3 (5b), 4 (5c), 5 (5d).



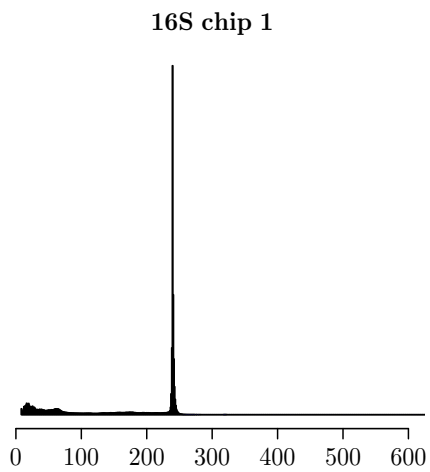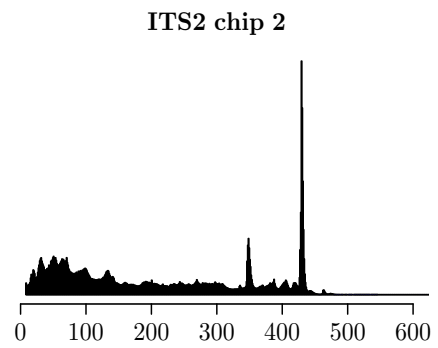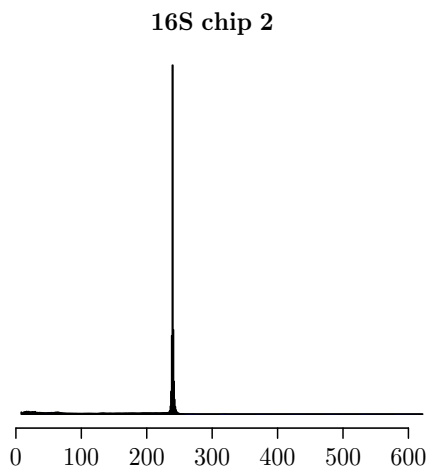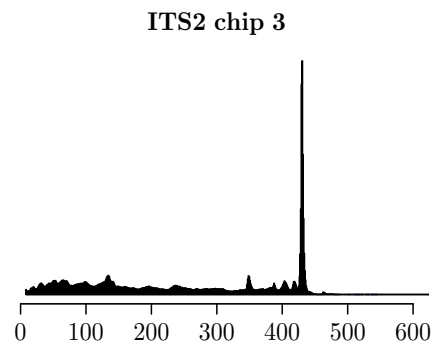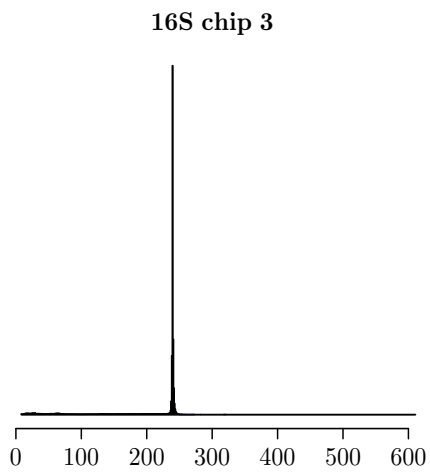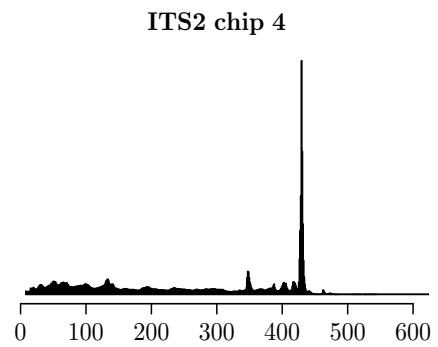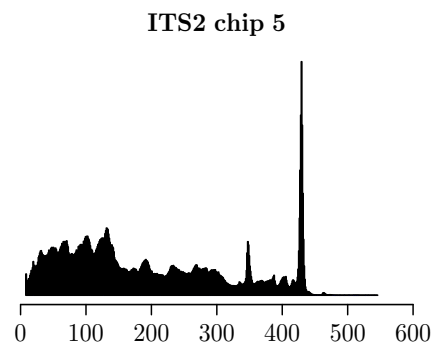

(a)

(b)

**Figure 6:** Read length distributions for all 16S (6a) and ITS2 (6b) data.

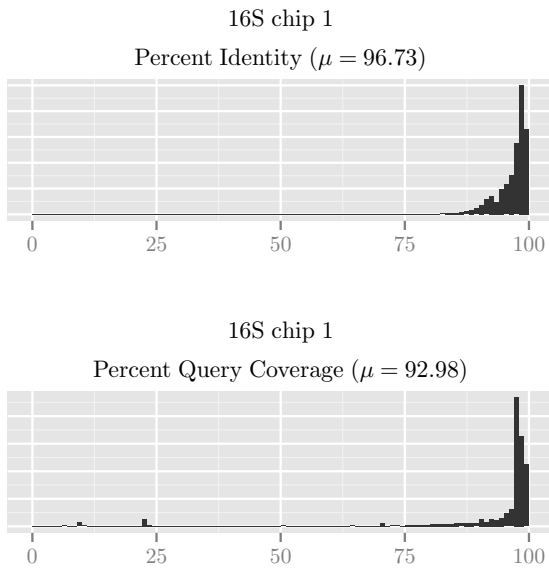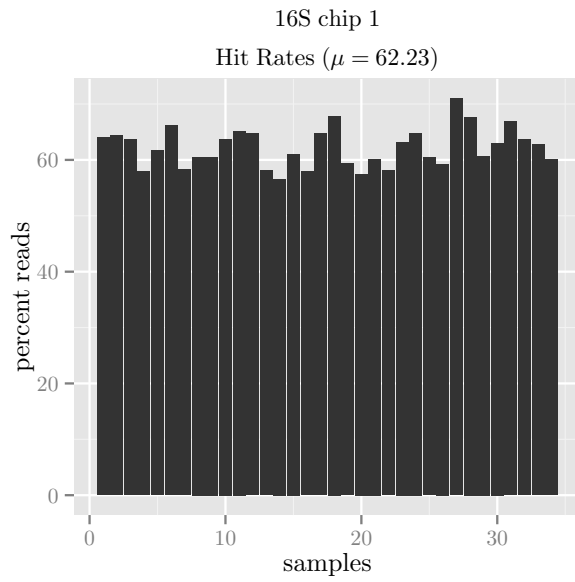

(a)

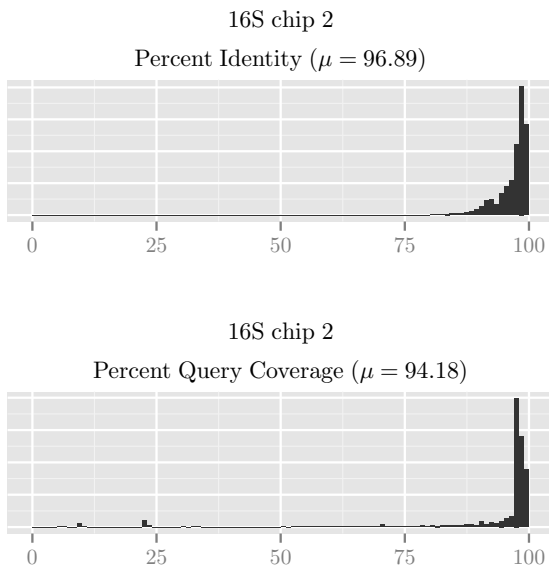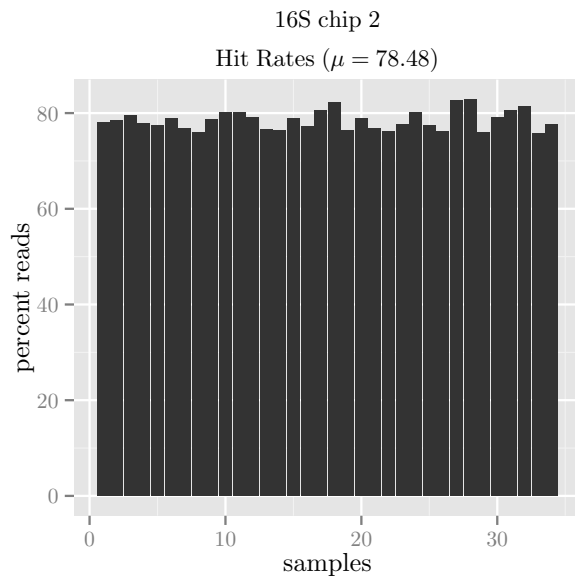

(b)

Figures 7a and 7b

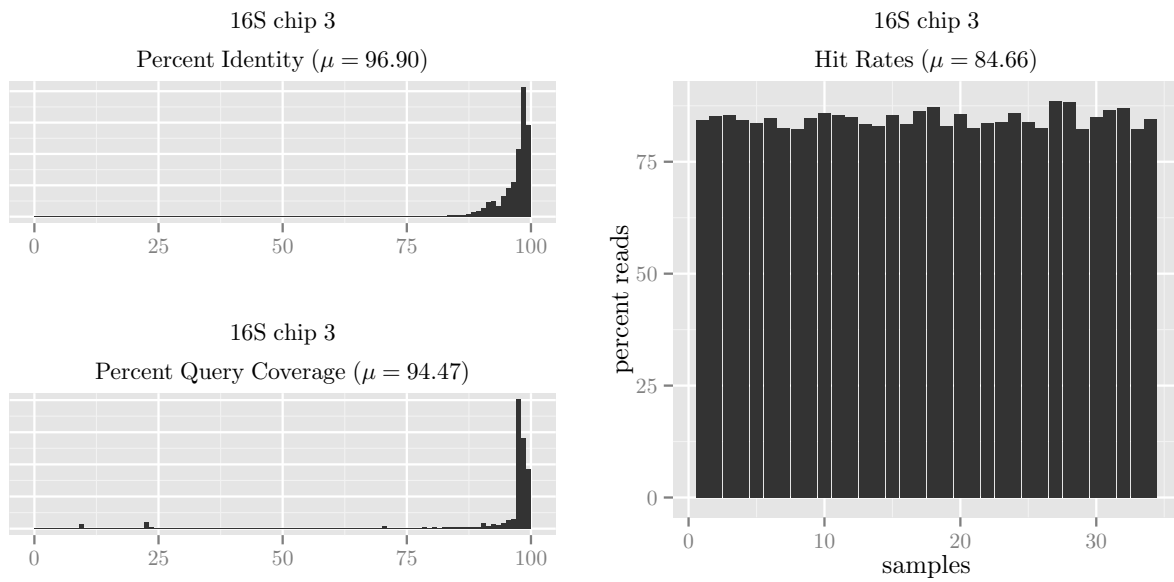

Figure 7c

**Figure 7:** Figures 7a, 7b, 7c shows the percent identities (%ID) and query coverages (%COV) of mapping sequences for chips 1, 2, 3; together with the percentages of sequences that are accepted as hit, after applying the 80% and 90% %COV and %ID cutoffs for all 34 samples.

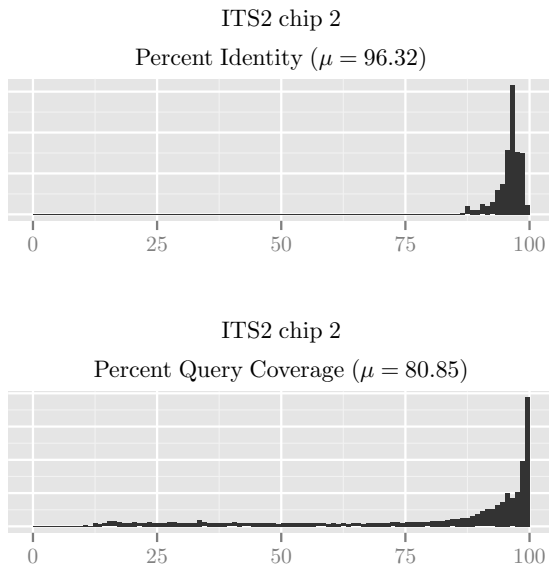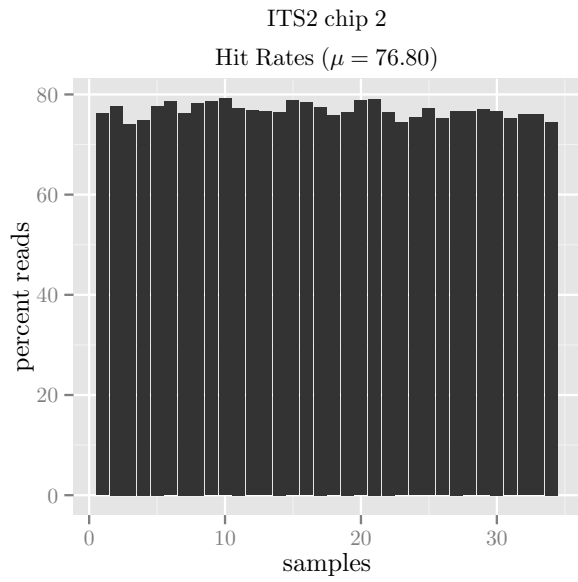

(a)

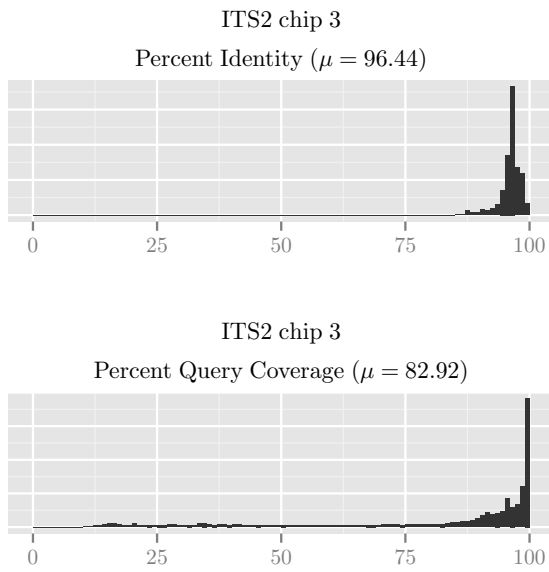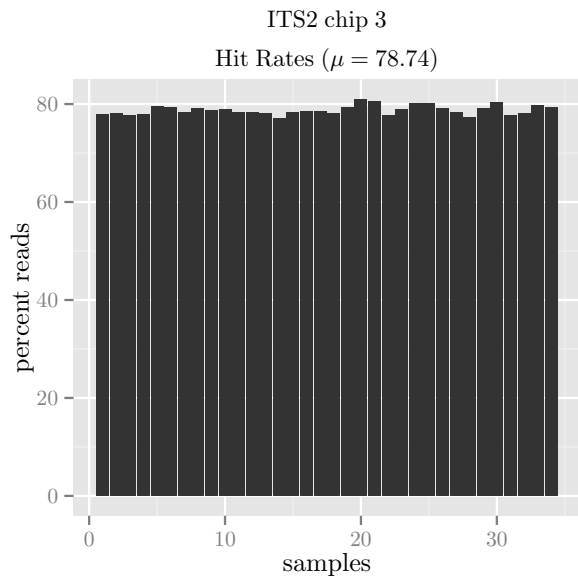

(b)

Figures 8a and 8b

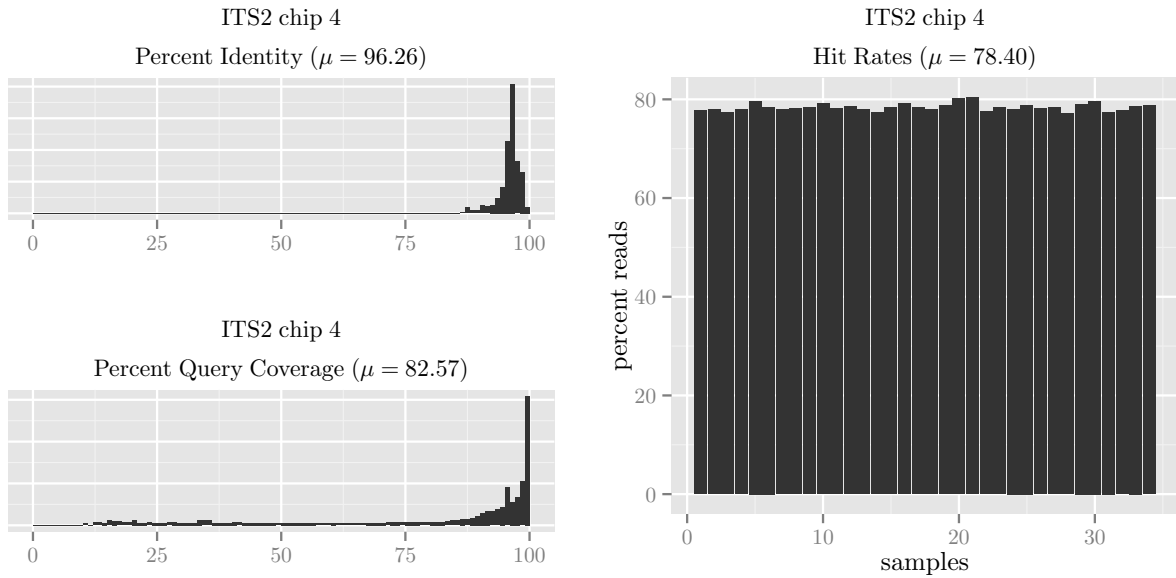

(c)

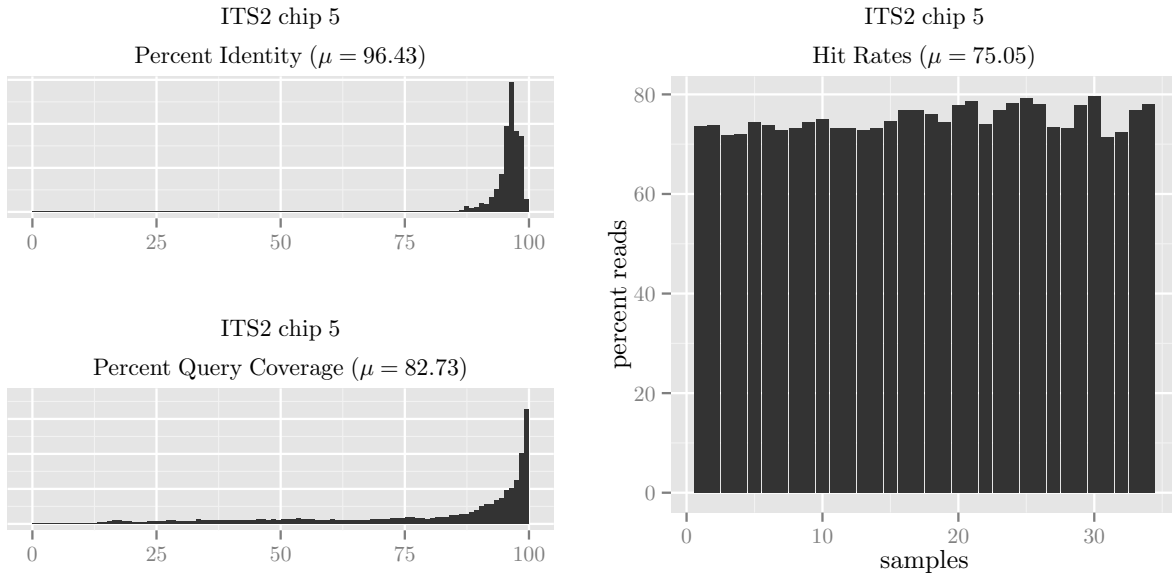

(d)

Figures 8c and 8d

**Figure 8:** Figures 8a, 8b, 8c, 8d shows the percent identities (%ID) and query coverages (%COV) of mapping sequences for chips 2, 3, 4, 5; together with the percentages of sequences that are accepted as hit, after applying the 80% and 90% %COV and %ID cutoffs for all 34 samples.

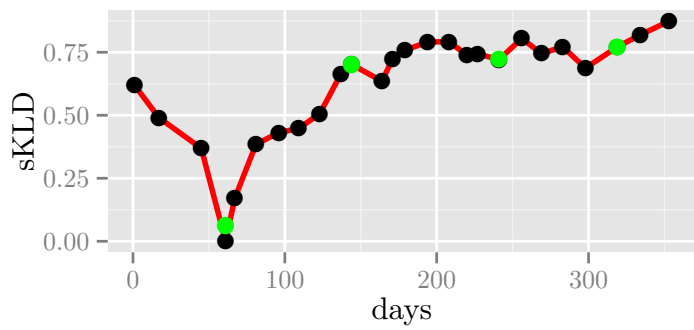

(a)

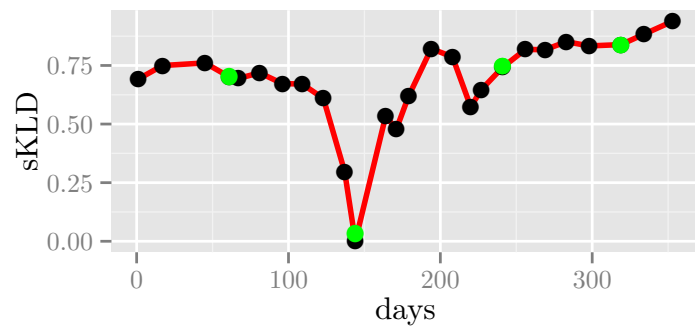

(b)

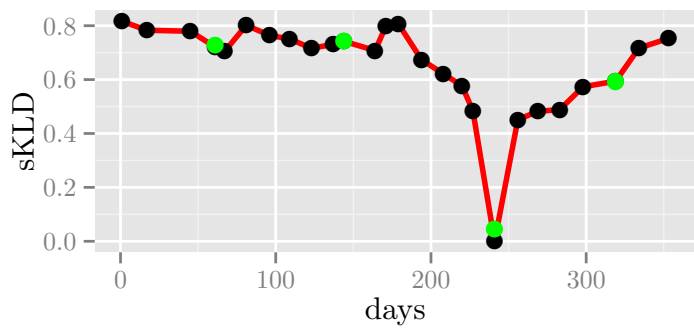

(c)

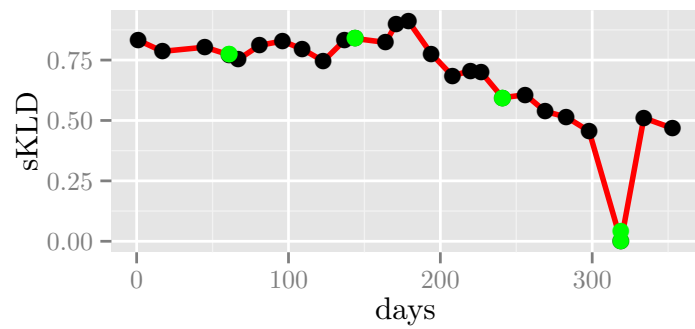

(d)

Figures 9a, 9b, 9c, and 9d

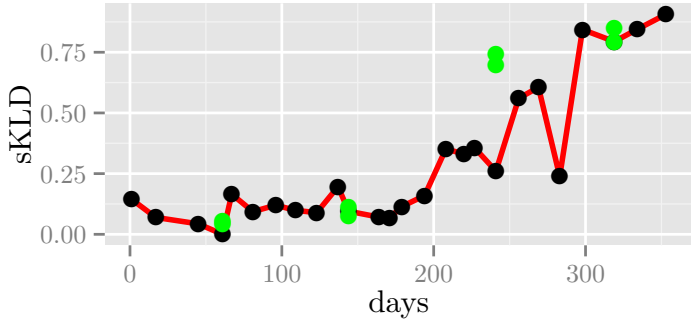

(e)

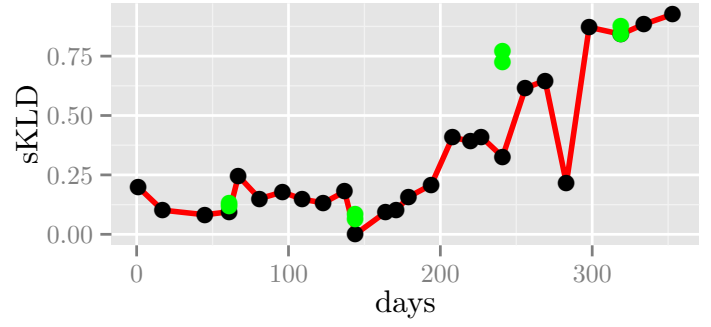

(f)

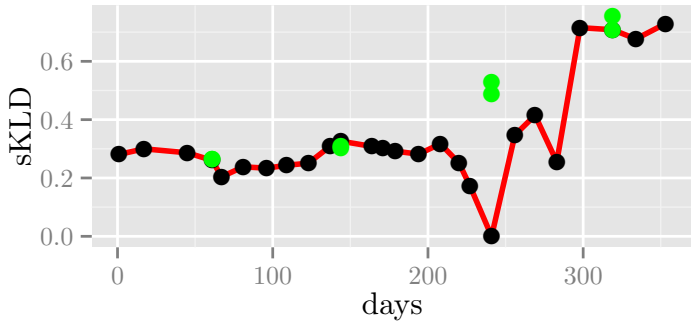

(g)

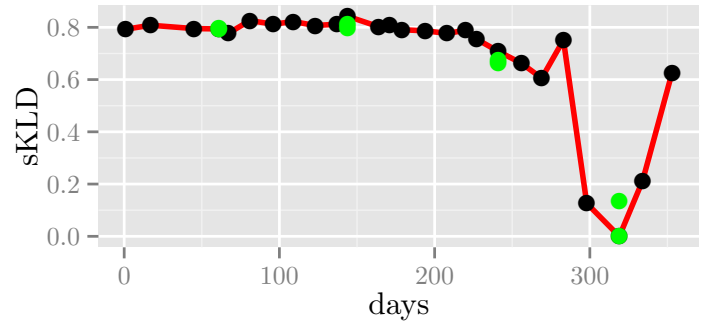

(h)

Figures 9e, 9f, 9g, and 9h

**Figure 9:** Divergences across selected samples: 9a, 9b, 9c, and 9d shows the distances between sample 4, 11, 19, 24, and all other samples, respectively for 16S data, whereas 9e, 9f, 9g, and 9h shows it for ITS2 data. Grey points correspond to original samples, while green points represent the technical replicates of the samples sharing their x-axis value. The zero KL distance (y-axis) on each plot indicates which sample all other samples are compared against. Good reproducibility is achieved when the green points superimposed over the fixed samples (4, 11, 19, 24) also have zero KLD values.

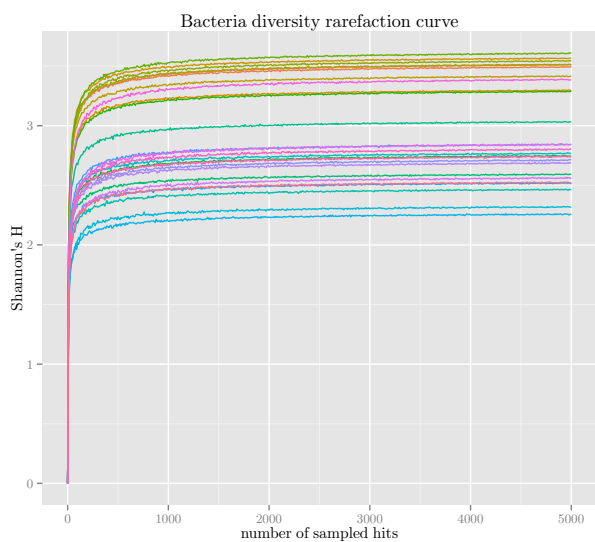

(a)

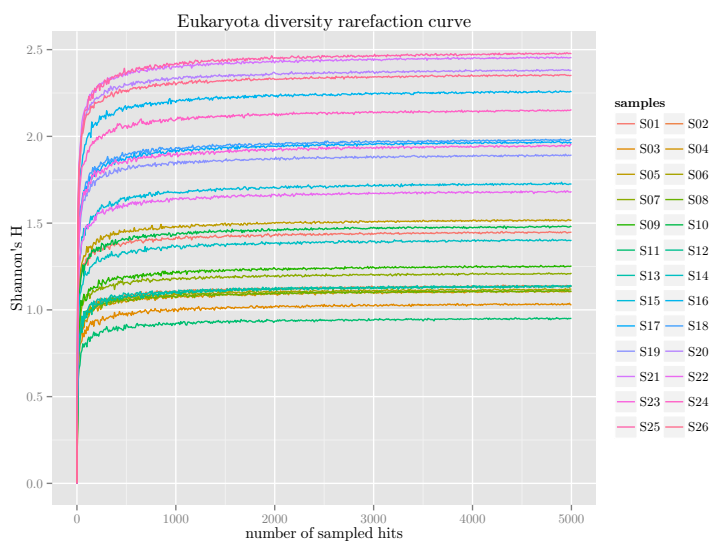

(b)

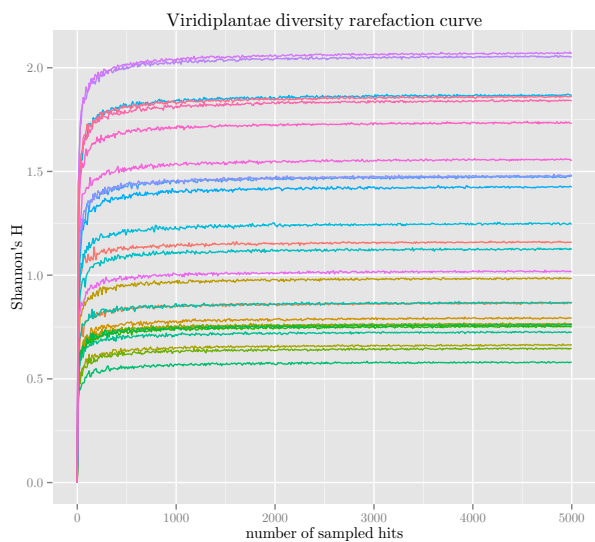

(c)

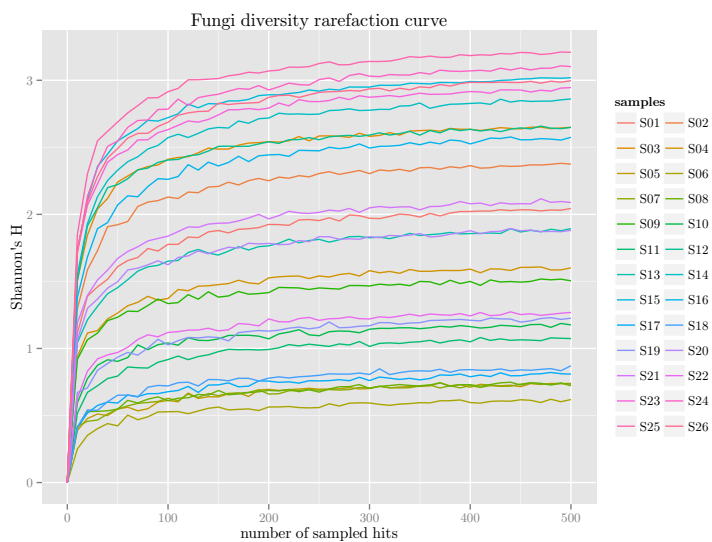

(d)

**Figure 10:** Rarefaction Curves: Depicts the converging diversity (Shannon H) rarefaction curves for Bacteria, Eukaryota, Viridiplantae, algae, and Fungi, over all 16S and ITS2 reference sequences, averaged over 100 iterations.



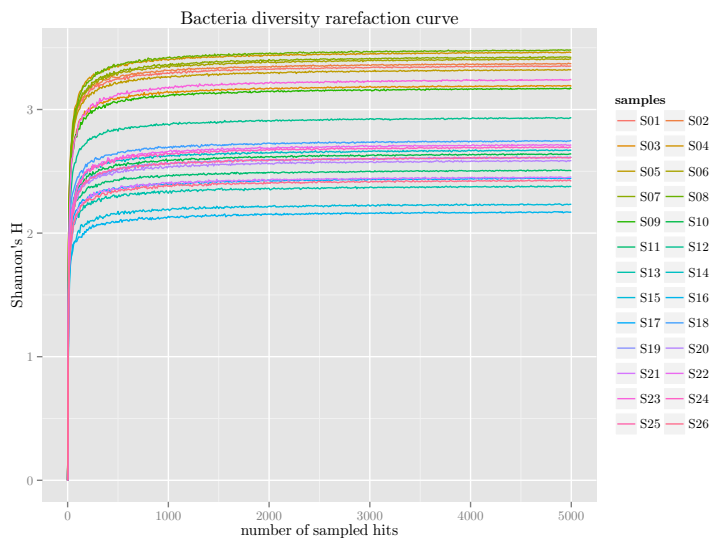

(a)

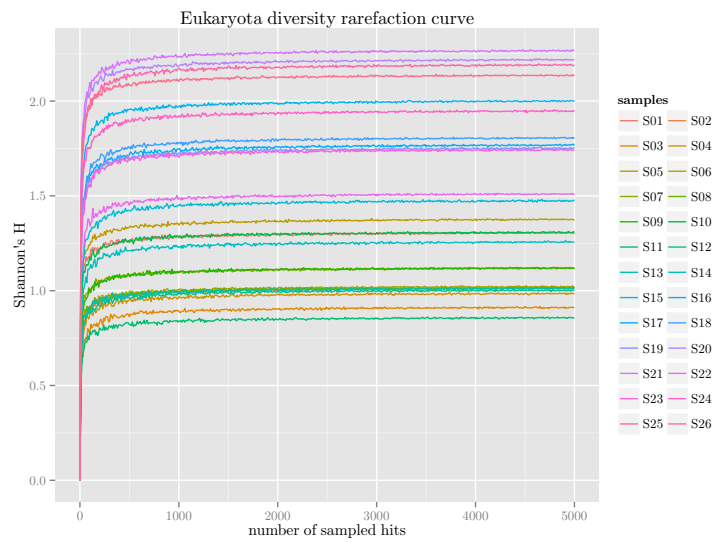

(b)

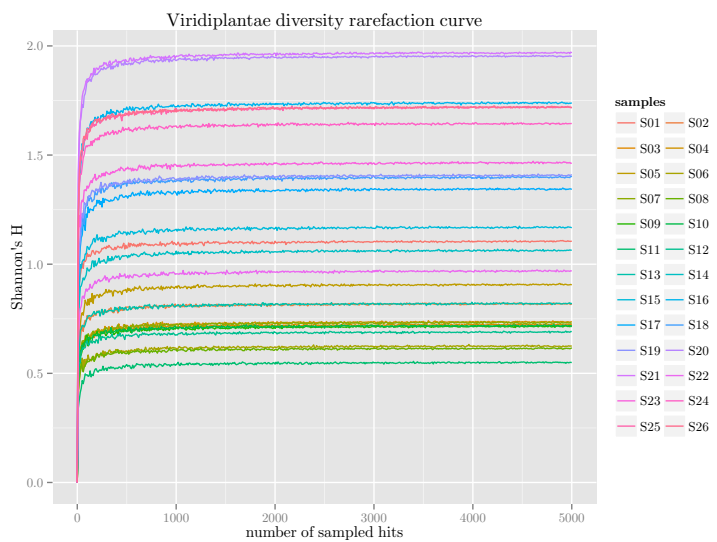

(c)

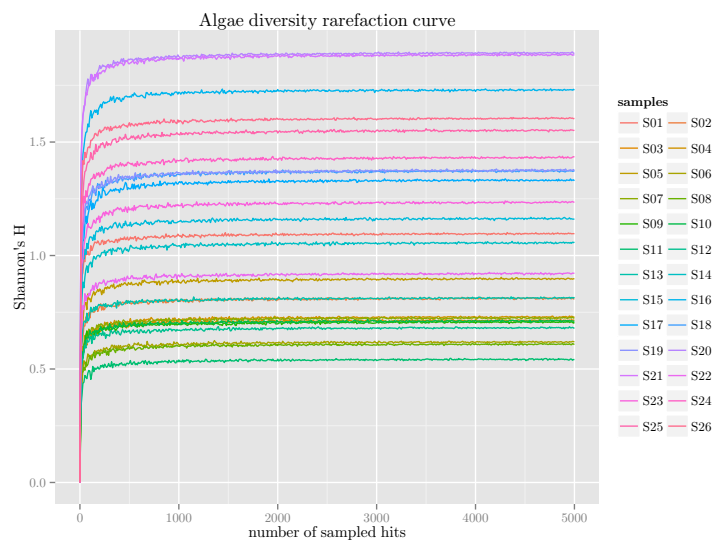

(d)

Figures 11a, 11b, 11c and 11d

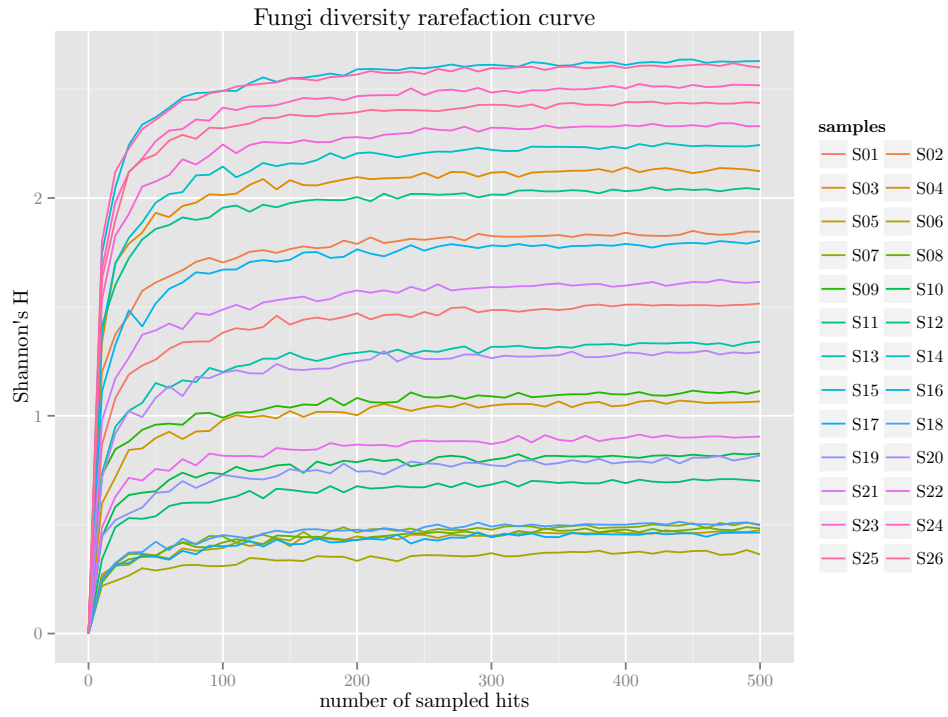

Figure 11e

**Figure 11:** Rarefaction Curves: Depicts the converging diversity (Shannon H) rarefaction curves for Bacteria, Eukaryota, Viridiplantae, algae, and Fungi, over the top 2000 and 200 16S and ITS2 reference sequences, averaged over 100 iterations.

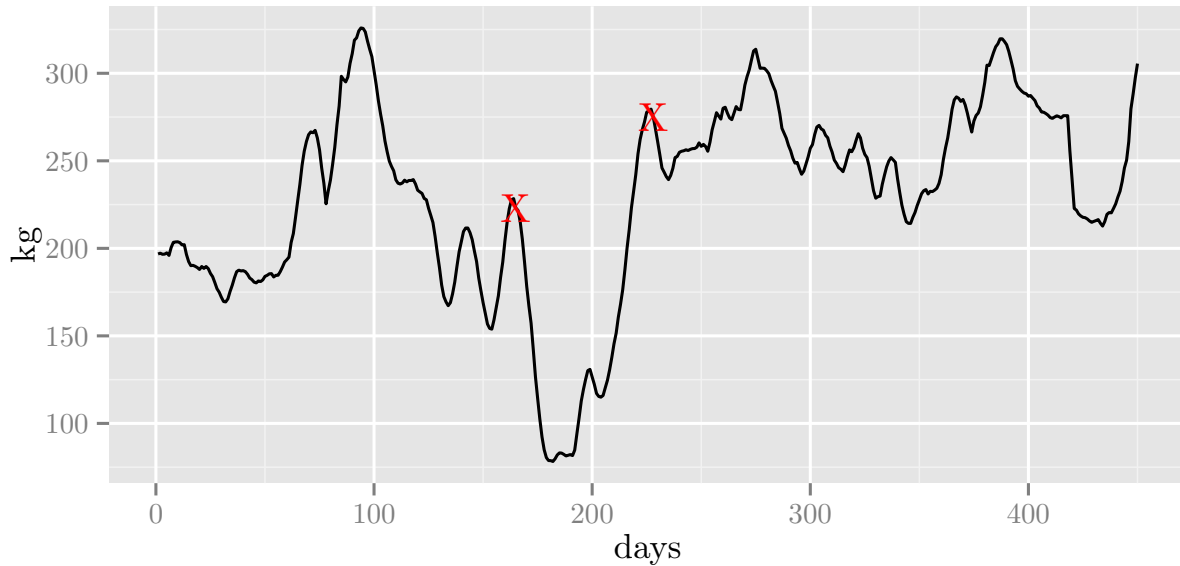

**Figure 12:** Dry weight (kg): Algal dry weight in kg, with peaks on days 165, and 228 marked.

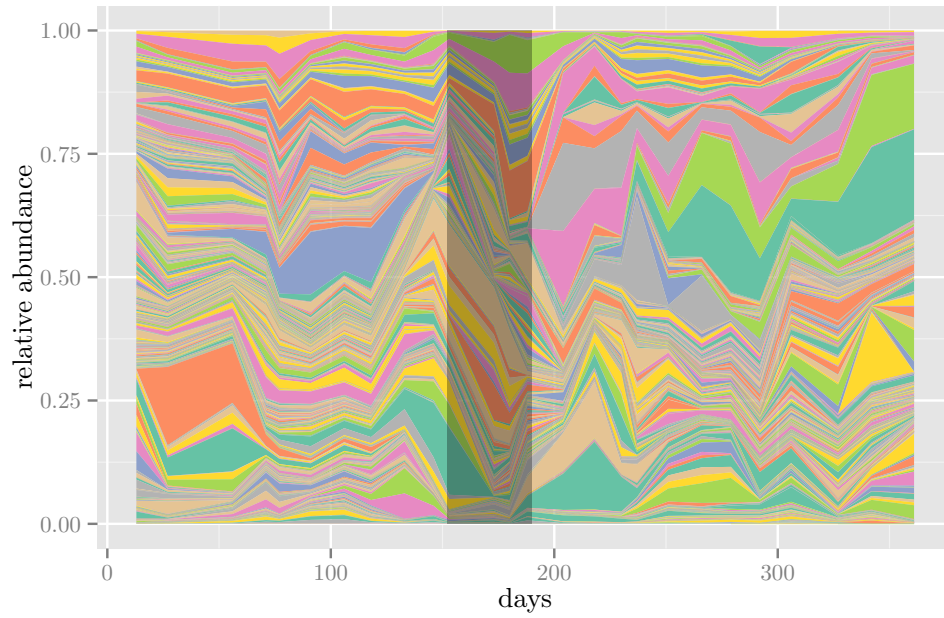

(a) Top 1000 sequences hit in GreenGenes.

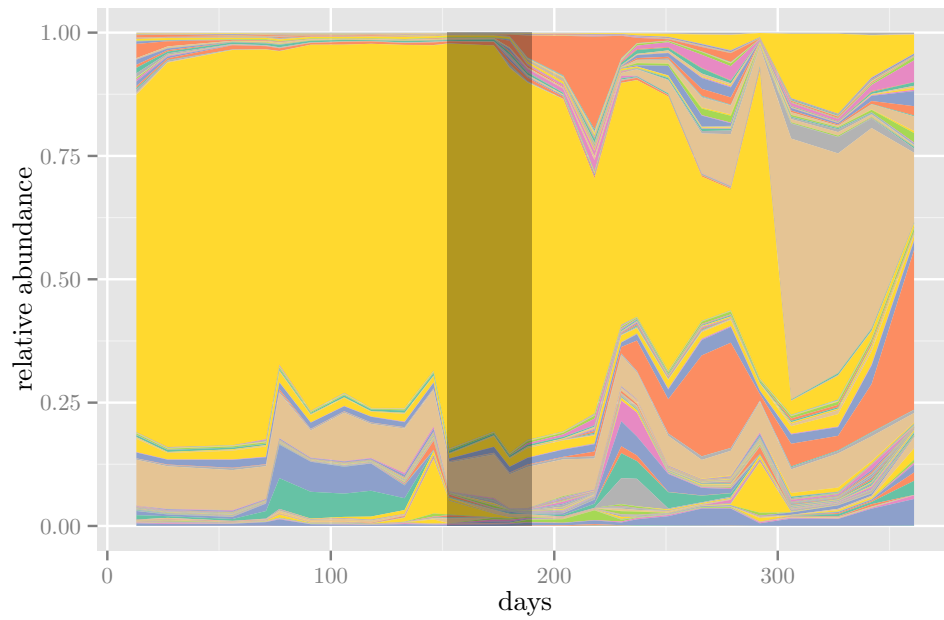

(b) Top 200 sequences hit in constructed ITS2 database from NCBI.

**Figure 13:** Finest granularity (sequence level) area plots: Top hit reference sequences in 16S, using two different databases, and ITS2 data, respectively.

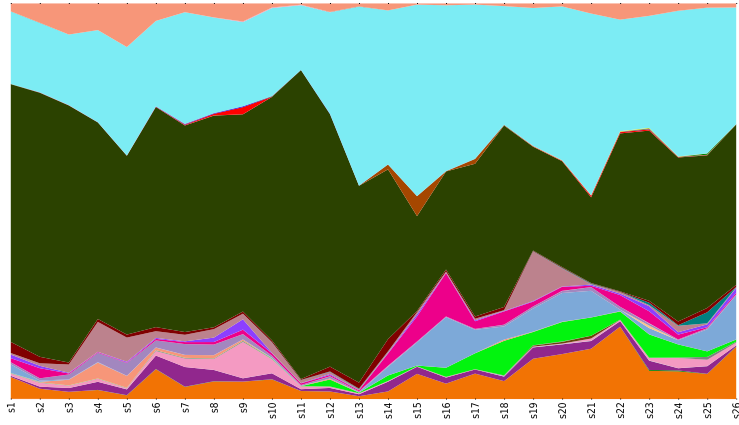

(a)

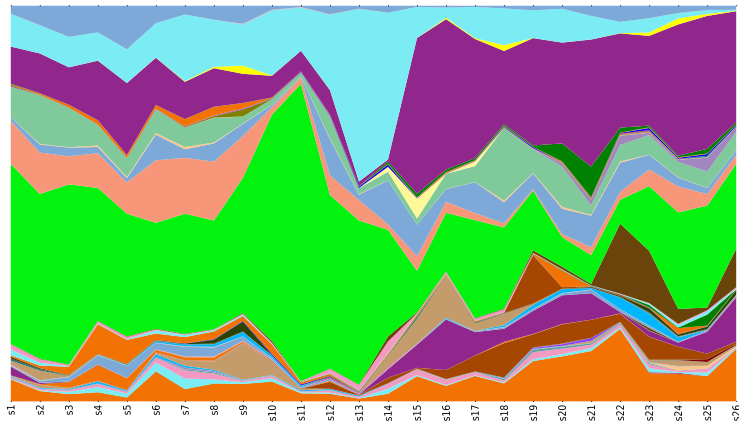

(b)

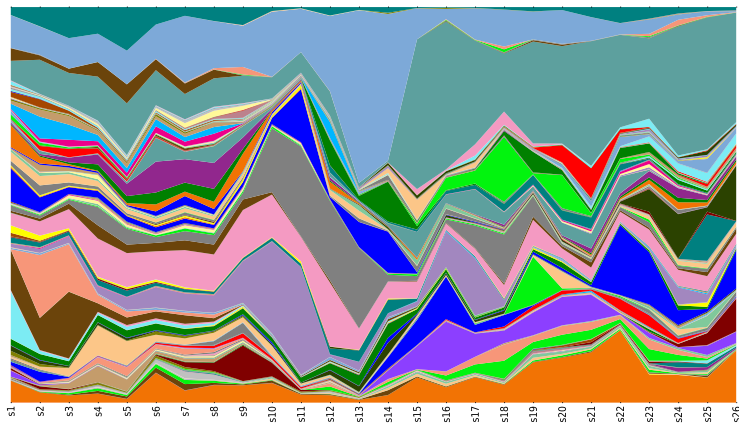

(c)

**Figure 14:** Braluzian Microbiome Pipeline area plots at phylum (14a), class (14b), and genus (14c) levels for 16S data. Taxa not shown.

Uncultured Cryptomycota partial 26S rRNA gene, clone Dmlmple3  
 Sequence ID: [emb|HE806179.1](#) Length: 1929 Number of Matches: 1

| Range 1: 1 to 549 <a href="#">GenBank</a> <a href="#">Graphics</a> <span style="float:right">▼ Next Match ▲ Previous Match</span> |                                                               |              |            |           |      |
|-----------------------------------------------------------------------------------------------------------------------------------|---------------------------------------------------------------|--------------|------------|-----------|------|
| Score                                                                                                                             | Expect                                                        | Identities   | Gaps       | Strand    |      |
| 628 bits(340)                                                                                                                     | 4e-176                                                        | 490/561(87%) | 15/561(2%) | Plus/Plus |      |
| Query 573                                                                                                                         | AAAAGAACTAACAAAGGATTCCTCAGTAACGGCGAGTGAAGCGGAAGAGCTCAAATTT    |              |            |           | 632  |
| Sbjct 1                                                                                                                           | AAAAGAACTAACAAAGGATTCCTCAGTAACGGCGAGTGAAGCGGAAGAGCTCAAATTT    |              |            |           | 60   |
| Query 633                                                                                                                         | GGAATCACTGCGCTTTG--TGCAGTGAATTGTAATTTCAAGACATGTGAGAAGAGTATTT  |              |            |           | 690  |
| Sbjct 61                                                                                                                          | GGAATCAC-G-GCAGTGCCTGCTGTGAATTTGTAATTTCAAGACATGTGGGAA-AGTGGAA |              |            |           | 117  |
| Query 691                                                                                                                         | GTGTGAGTTCAAGTCTCTCTGGAATGGAGCACCAAGAGGGTGCAGTCCCGCTGGATAC    |              |            |           | 750  |
| Sbjct 118                                                                                                                         | GGCGTGTTCAGTCTCTCTGGAATGGAGCACCAAGAGGGTGCAGTCCCGCTGGACAC      |              |            |           | 177  |
| Query 751                                                                                                                         | GCACGGAATATTTAACTCTCTAGTGTGACGAGTGCAGTGGCTGGGAATGCAGCTCAAA    |              |            |           | 810  |
| Sbjct 178                                                                                                                         | G-ACTG-ACCGTGAA-TCTCTAGTGTGACGAGTGCAGTGGCTGGGAATGCAGCTCAAA    |              |            |           | 234  |
| Query 811                                                                                                                         | AGGGTGGTAAATCCATCCAAGGCTAAATTTGGCAAGAGACCGATAGCGAACAAAGTACC   |              |            |           | 870  |
| Sbjct 235                                                                                                                         | TGGTGGTAAATCCATCCAAGGCTAAATTTGGCAAGAGACCGATAGCGAACAAAGTACC    |              |            |           | 294  |
| Query 871                                                                                                                         | GTGAGGAAAGATGAAAAGCACCTTAAAAGGGAGTTAAATAGCACGTGAAATGTTAAA     |              |            |           | 930  |
| Sbjct 295                                                                                                                         | GTGAGGAAAGATGAAAAGCACCTTAAAAGGGAGTTAAATAGCACGTGAAATGTTAAA     |              |            |           | 354  |
| Query 931                                                                                                                         | AGGAAACGATCGCGGCTGAGAAGGGGCGCTTCTGAAGCAGTCTTCTGAGGAGATTGT     |              |            |           | 990  |
| Sbjct 355                                                                                                                         | AGGAAACGATCGCGGCTGAGTGCAGGTTGAAGCAGTCTTCTGAGGAGATTGC          |              |            |           | 414  |
| Query 991                                                                                                                         | TGTATGAGCGTCCAGTGTGCTTTGGTGCAGTTCGCAATAAGACTGGAGTGAAGGC       |              |            |           | 1050 |
| Sbjct 415                                                                                                                         | AGTATGGTCCACTCAAGTGGGAATCGGTGCAGTGTGCTGAATAAGACTAGAGTGAAGGC   |              |            |           | 474  |
| Query 1051                                                                                                                        | ATGTGATCATTTTGATTACATGTCTCTTTGGGAGAGC-GGAAAGTGTACTGGAGTG      |              |            |           | 1109 |
| Sbjct 475                                                                                                                         | ATGTGA-C-TTTG-G-TGCAATGCTCTTTGGACAGCAGTGCAGTA-TACCGGTTTC      |              |            |           | 529  |
| Query 1110                                                                                                                        | CATGATTTGGCCTTGAACGAC 1130                                    |              |            |           |      |
| Sbjct 530                                                                                                                         | CATG-TTTGGCCTTGAACGAC 549                                     |              |            |           |      |

(a) Alignment of GI: 532165669

Uncultured Cryptomycota partial 26S rRNA gene, clone Dmlmple3  
 Sequence ID: [emb|HE806179.1](#) Length: 1929 Number of Matches: 1

| Range 1: 1 to 550 <a href="#">GenBank</a> <a href="#">Graphics</a> <span style="float:right">▼ Next Match ▲ Previous Match</span> |                                                               |              |            |           |      |
|-----------------------------------------------------------------------------------------------------------------------------------|---------------------------------------------------------------|--------------|------------|-----------|------|
| Score                                                                                                                             | Expect                                                        | Identities   | Gaps       | Strand    |      |
| 680 bits(368)                                                                                                                     | 0.0                                                           | 502/564(89%) | 20/564(3%) | Plus/Plus |      |
| Query 584                                                                                                                         | AAAAGAACTAACAAAGGATTCCTCAGTAACGGCGAGTGAAGCGGAAGAGCTCAAATTT    |              |            |           | 643  |
| Sbjct 1                                                                                                                           | AAAAGAACTAACAAAGGATTCCTCAGTAACGGCGAGTGAAGCGGAAGAGCTCAAATTT    |              |            |           | 60   |
| Query 644                                                                                                                         | GGAATCACTGCGCTTG--TGCAGTGAATTGTAATTTCAAGACATGTGGGAA-G-GGTAG   |              |            |           | 699  |
| Sbjct 61                                                                                                                          | GGAATCACGGCAGTGCCTG-T-GTAATTTGTAATTTCAAGACATGTGGGAAAGTGGAA    |              |            |           | 118  |
| Query 700                                                                                                                         | TTGTGCGTGTTCAGTCTCTCTGGAATGGAGCACCAAGAGGGTGCAGTCCCGCTGGAC     |              |            |           | 759  |
| Sbjct 119                                                                                                                         | --G-GCGTGTTCAGTCTCTCTGGAATGGAGCACCAAGAGGGTGCAGTCCCGCTGGAC     |              |            |           | 175  |
| Query 760                                                                                                                         | ATGTATGAATGCTGAACCTCTCTAGTGTGACGAGTGCAGTGGCTGGGAATGCAGCTCAA   |              |            |           | 819  |
| Sbjct 176                                                                                                                         | ACGACTGACG-TGAA-TCTCTAGTGTGACGAGTGCAGTGGCTGGGAATGCAGCTCAA     |              |            |           | 233  |
| Query 820                                                                                                                         | AAGGTGGTAAATCCATCCAAGGCTAAATTTGGCAAGAGACCGATAGCGAACAAAGTACC   |              |            |           | 879  |
| Sbjct 234                                                                                                                         | ATGGTGGTAAATCCATCCAAGGCTAAATTTGGCAAGAGACCGATAGCGAACAAAGTACC   |              |            |           | 293  |
| Query 880                                                                                                                         | CGTGAAGGAAAGATGAAAAGCACCTTAAAAGGGAGTTAAATAGCACGTGAAATGTTAA    |              |            |           | 939  |
| Sbjct 294                                                                                                                         | CGTGAAGGAAAGATGAAAAGCACCTTAAAAGGGAGTTAAATAGCACGTGAAATGTTAA    |              |            |           | 353  |
| Query 940                                                                                                                         | AAGGAAACGATCGCGGCTGAGTAGGGGCGGGCTGAAGGCAGTCTTCTGAGGAGATTG     |              |            |           | 999  |
| Sbjct 354                                                                                                                         | AAGGAAACGATCGCGGCTGAGTGCAGGTTGAAGCAGTCTTCTGAGGAGATTG          |              |            |           | 413  |
| Query 1000                                                                                                                        | TTGTATGG-C-ACGTTCCGGGTGTGCTTTGGTGGAGGGTCCGAAATAACTAGAGTGAG    |              |            |           | 1057 |
| Sbjct 414                                                                                                                         | CAGTATGGTCCAC-TTCAA-GTGGAAATCGGTGACAGTGTGCTGAATAAGACTAGAGTGAG |              |            |           | 471  |
| Query 1058                                                                                                                        | GGCATGTATCTTTGGGATGCAATGTCTCTTTGGGACGCGGAGGCTGTACTGGAG        |              |            |           | 1117 |
| Sbjct 472                                                                                                                         | GGCATGTGA-CTTT-GG--TCGCAATGCTCTTTGGGACGAGTGCAGTATACCGGTT      |              |            |           | 527  |
| Query 1118                                                                                                                        | TGCATGATTTGGCCTTGAACGAC 1141                                  |              |            |           |      |
| Sbjct 528                                                                                                                         | TCCATG-TTTGGCCTTGAACGAC 550                                   |              |            |           |      |

(b) Alignment of GI: 532165968

Uncultured Chytridiomycota clone 2S1.03.S04 18S ribosomal RNA gene, partial sequence;  
 Sequence ID: [gb|EF619856.1](#) Length: 545 Number of Matches: 1

| Range 1: 167 to 364 <a href="#">GenBank</a> <a href="#">Graphics</a> <span style="float:right">▼ Next Match ▲ Previous Match</span> |                                                              |              |           |           |     |
|-------------------------------------------------------------------------------------------------------------------------------------|--------------------------------------------------------------|--------------|-----------|-----------|-----|
| Score                                                                                                                               | Expect                                                       | Identities   | Gaps      | Strand    |     |
| 243 bits(131)                                                                                                                       | 4e-60                                                        | 178/200(89%) | 5/200(2%) | Plus/Plus |     |
| Query 114                                                                                                                           | CAC-TTTACCGTGTGTGTGTTGACAGAGTATTGTTG--CTTTAAATATAGACAACCTT   |              |           |           | 170 |
| Sbjct 167                                                                                                                           | CACATTTGCGCTGTGTGTGTTGACAGAGT-AGTGTGTACCATGAATAATGACAACCTT   |              |           |           | 225 |
| Query 171                                                                                                                           | TAAACAATGGATCTCTTGGCCCTTGCACGATGAAGAACGCGATAAAGTGCATATCTAGT  |              |           |           | 230 |
| Sbjct 226                                                                                                                           | TAAACAATGGATCTCTTGGCTTGTCAACGATGAAGAACGCGATAAATGCGATACGTAGT  |              |           |           | 285 |
| Query 231                                                                                                                           | GCGATTTGCATGAATCTGTGAGTCACTGAGTTTTTGAACGCAACTTGGCCCGAGCAATGG |              |           |           | 290 |
| Sbjct 286                                                                                                                           | GCGATTTGCATGAATCTGTGAGTCACTGAGTCTTGAACGCAACTTGGCCATCCAT-G    |              |           |           | 344 |
| Query 291                                                                                                                           | GCATGCTGTTTGAGTACCG 310                                      |              |           |           |     |
| Sbjct 345                                                                                                                           | GCATGCTGTTTGAGTACCG 364                                      |              |           |           |     |

(c) Alignment of GI: 194354257

Amoebophilidium sp. PML-2014 isolate FD01 18S ribosomal RNA gene, partial sequence;  
 Sequence ID: [gb|JX967274.1](#) Length: 4667 Number of Matches: 3

| Range 1: 3206 to 3631 <a href="#">GenBank</a> <a href="#">Graphics</a> <span style="float:right">▼ Next Match ▲ Previous Match</span> |                                                               |              |           |           |      |
|---------------------------------------------------------------------------------------------------------------------------------------|---------------------------------------------------------------|--------------|-----------|-----------|------|
| Score                                                                                                                                 | Expect                                                        | Identities   | Gaps      | Strand    |      |
| 424 bits(229)                                                                                                                         | 3e-114                                                        | 363/429(85%) | 6/429(1%) | Plus/Plus |      |
| Query 757                                                                                                                             | GATCTCAAATCAGACAAGACTACCCGCTGAACTTAAGCATATTAATAAGCGGAGGAAAAAG |              |           |           | 816  |
| Sbjct 3206                                                                                                                            | GATCTCAAATCAGACAAGATTACCCGCTGAACTTAAGCATATTAATAAGCGGAGGAAAAAG |              |           |           | 3265 |
| Query 817                                                                                                                             | AAACAACAGGGATTCCTCAGTAATGGCGAATGAAGCGGGAATAGCTCAAATTTGAAAT    |              |           |           | 876  |
| Sbjct 3266                                                                                                                            | AAACTAACAGGATTCCTCATAGTAACGGCGAGTGAAGTGGGAACAGCTCAAATTTGTAAT  |              |           |           | 3325 |
| Query 877                                                                                                                             | CTCTAACGAGAATTGTAGTTGTAGAGGCGACCTCGAATGGCAGCTGGGACAAGTCTCT    |              |           |           | 936  |
| Sbjct 3326                                                                                                                            | CTCTTCGGAGAGTTGTAATTTGTAGAGGCGTTTTCAGCGTTAACC-GGGTAGAAGT-CT   |              |           |           | 3383 |
| Query 937                                                                                                                             | C-TGGAATGGGCGATCATGGAGGGTGAAGATCCCGTGAATGGCCAGGTA--CTGTCA     |              |           |           | 993  |
| Sbjct 3384                                                                                                                            | CTTGGGAAGAGCGTCAAGAGGGTGAAGATCCCGTTCGTGATCGGGTATACCG-CAGA     |              |           |           | 3442 |
| Query 994                                                                                                                             | CTTGAGTCTCTTCTAAGAGTCCGGTGTGTTGGGAATGCAGCCCTAAGTCGGTGTATAT    |              |           |           | 1053 |
| Sbjct 3443                                                                                                                            | TATGATACGCTTTCAAAGAGTCCGGTGTGTTGGGACTGCAGCCCTAAATTTGGTGTATAT  |              |           |           | 3502 |
| Query 1054                                                                                                                            | TCCATCTAAAGCTAAATATTGGCGAGAGCCGATAGCAACAAGTACCGTGAAGGAAAAA    |              |           |           | 1113 |
| Sbjct 3503                                                                                                                            | TCCATCTAAAGCTAAATACAGGCGAGAGCCGATAGCGAACAAAGTACTGTGAAGGAAAAA  |              |           |           | 3562 |
| Query 1114                                                                                                                            | TGAAAAGAACTTTGAAAAGAGAGTTAAAAGTACGTGAAATTTGCTAAAAGGAAAAAGT    |              |           |           | 1173 |
| Sbjct 3563                                                                                                                            | TGAAAAGAACTCTGAAGAGAGAGTTAAAAGTACGTGAAATTTGCTAAAAGGAAAAAGT    |              |           |           | 3622 |
| Query 1174                                                                                                                            | AAACCAGTG 1182                                                |              |           |           |      |
| Sbjct 3623                                                                                                                            | AAATCAGTG 3631                                                |              |           |           |      |

(d) Alignment of GI: 532165358

Figures 15a, 15b, 15c, and 15d

Amoebophilidium sp. PML-2014 isolate FD01 18S ribosomal RNA gene, partial sequence;  
 Sequence ID: [gb|JX967274.1](#) Length: 4667 Number of Matches: 3

| Range 1: 3205 to 3622 |        | <a href="#">GenBank</a>                                        | <a href="#">Graphics</a> | ▼ Next Match | ▲ Previous Match |
|-----------------------|--------|----------------------------------------------------------------|--------------------------|--------------|------------------|
| Score                 | Expect | Identities                                                     | Gaps                     | Strand       |                  |
| 431 bits(233)         | 2e-116 | 359/421(85%)                                                   | 6/421(1%)                | Plus/Plus    |                  |
| Query                 | 639    | CGATCTCAAATCAGACAAGACTACCCGCTGAACCTAAGCATATTAATAAGCGGAGGAAAA   |                          |              | 698              |
| Sbjct                 | 3205   | CGATCTCAAATCAGACAAGATTACCCGCTGAACCTAAGCATATYAATAAGCGGAGGAAAA   |                          |              | 3264             |
| Query                 | 699    | GAAACCAACAGGGATTCCCCAGTAATGGCGAATGAAGCGGGAATAGCTCAAATTTTTAA    |                          |              | 758              |
| Sbjct                 | 3265   | GAAACTAACAGGATTCCCATAGTAACGGCGAGTGAAGTGGGAACAGCTCAAATTTGTAA    |                          |              | 3324             |
| Query                 | 759    | TCTCTTCGGAGAGTTGTAATTTGAAGAGGTGACATCGTCGCTTTGCTCGTCAAAGTCT     |                          |              | 818              |
| Sbjct                 | 3325   | TCTCTTCGGAGAGTTGTAATTTGTAGAGGCGTTTCGACG-GTTAACCGGGTAGAAGTCT    |                          |              | 3383             |
| Query                 | 819    | CCTGGAAAGGAGCAACATGGAGGGTGAAATTCCTGATC-CGA-CCAGGTTGAAGGC-GC    |                          |              | 875              |
| Sbjct                 | 3384   | CTTGGGAAAGAGCGTCACAGAGGGTGAGAAATCCCGTATC-TCGTATCCGGGTATCCCGAGA |                          |              | 3442             |
| Query                 | 876    | TCTTGATTATTCTCAAAGAGTCGGGTTGCTTGAGACTGCAGCCCAAAGTGGGTGGTATA    |                          |              | 935              |
| Sbjct                 | 3443   | T-ATGATACGCTTCAAAGAGTCGGGTTGTTGGGACTGCAGCCCTAAATGGTGGTATA      |                          |              | 3501             |
| Query                 | 936    | TTCCATCTAAAGCTAAATATTGGCGAGAGACCGATAGCAAAACAAGTACCGTGAGGGAAAG  |                          |              | 995              |
| Sbjct                 | 3502   | TTCCATCTAAAGCTAAATACAGGCGAGAGACCGATAGCGAAACAAGTACTGTGAAGGAAAG  |                          |              | 3561             |
| Query                 | 996    | ATGAAAAGAACTTTGAAGAGAGTTAAAAGTACGTGAAATTGCTAAAAGGGAAACGTTT     |                          |              | 1055             |
| Sbjct                 | 3562   | ATGAAAAGAACCTGAAGAGAGAGTTAAAAGTACGTGAAATTGCTAAAAGGGAAACGTTT    |                          |              | 3621             |
| Query                 | 1056   | G                                                              |                          |              | 1056             |
| Sbjct                 | 3622   | G                                                              |                          |              | 3622             |

Figure 15e

(e) Alignment of GI: 532166006

Figure 15: Alignment results of the five most abundant fungal sequences to their highest scoring BLAST hits of known phylum level taxonomy.

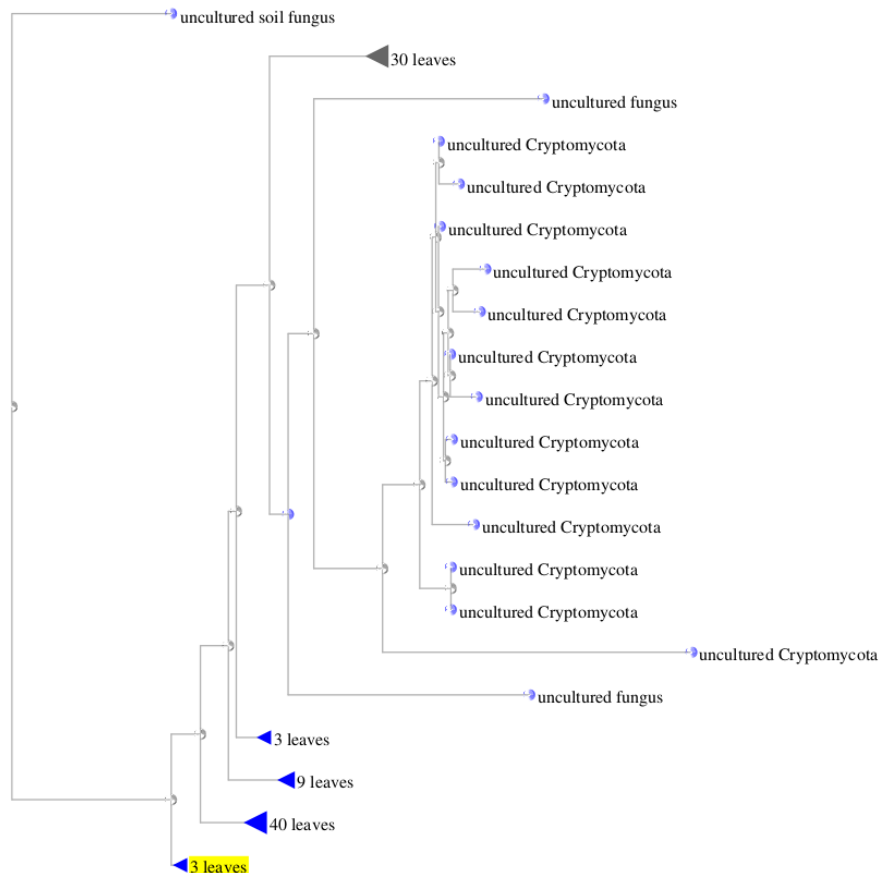

Figure 16: Distance tree for GI: 532165669, and GI: 532165968, collapsed on the branch highlighted in yellow.

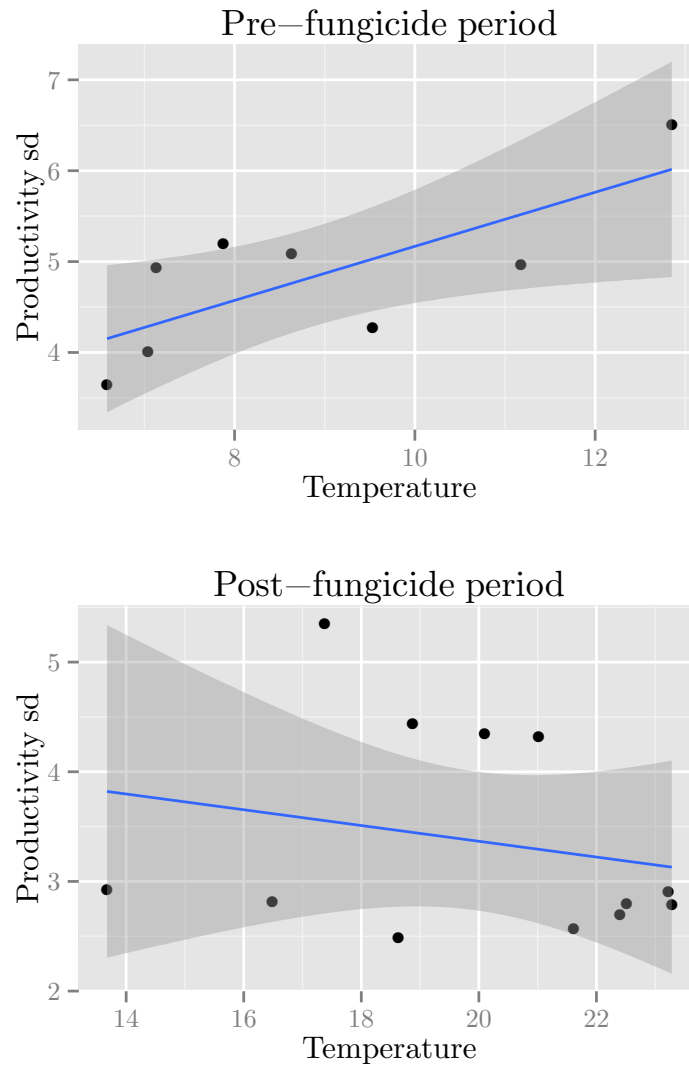

**Figure 17:** Pre- and post-fungicide temperature and productivity variability relationship.

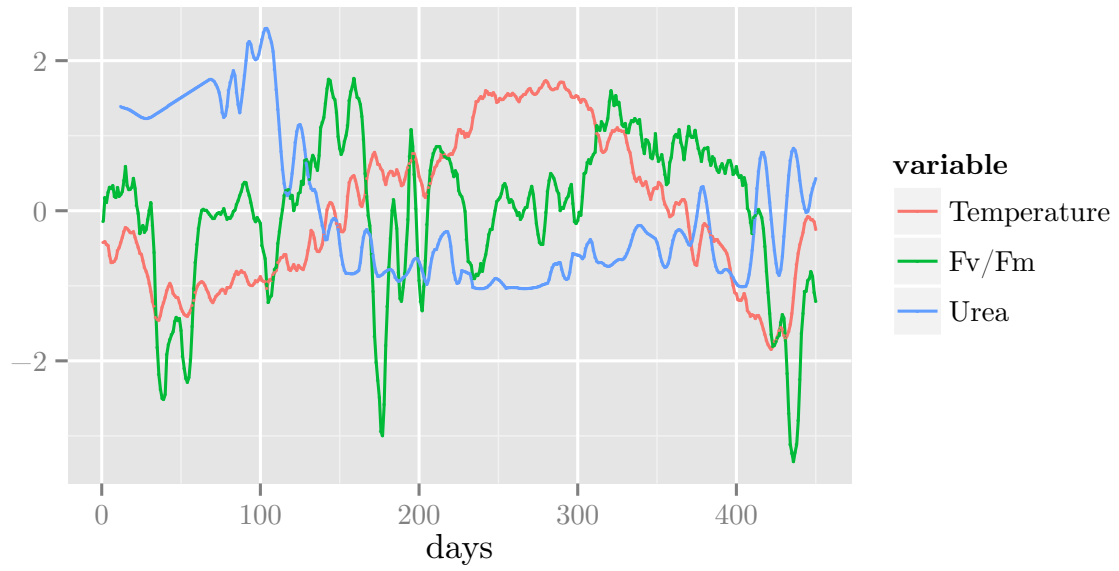

**Figure 18:** Select Phenotypes: Relationship of temperature, urea, and photosynthetic health ( $F_v/F_m$ ) over time, standardised by centering around their mean and division by their standard deviation.



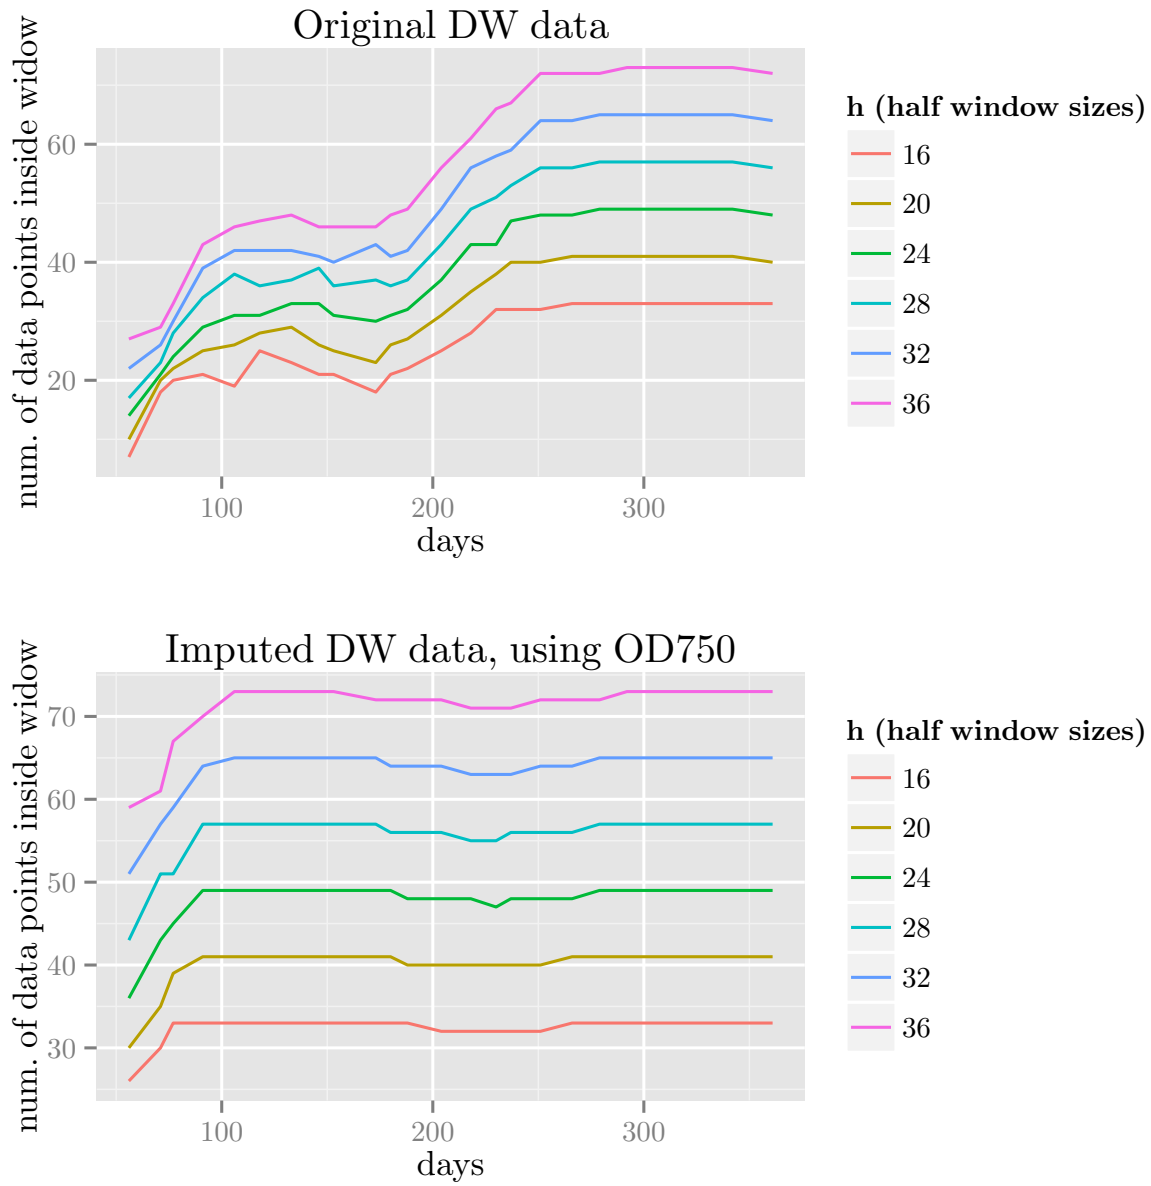

**Figure 19:** Number of available data points inside given half window ( $h$ ) in original and imputed (using OD 750) DW (g/l) data.

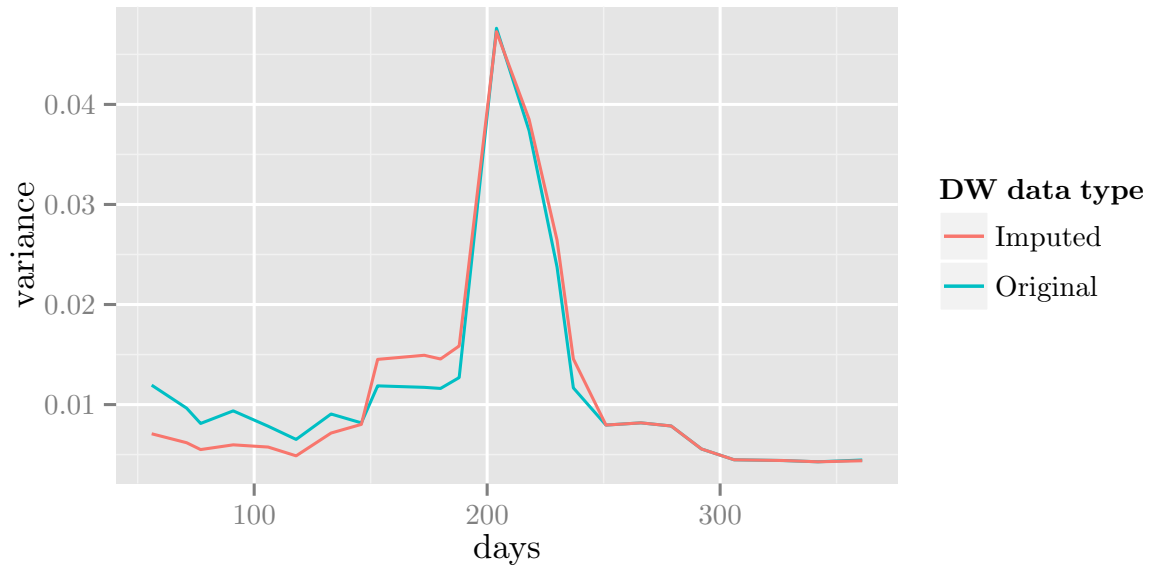

**Figure 20:** Variance patterns of original and imputed (using OD 750) DW (g/l) data using half window size of  $h = 28$  days.

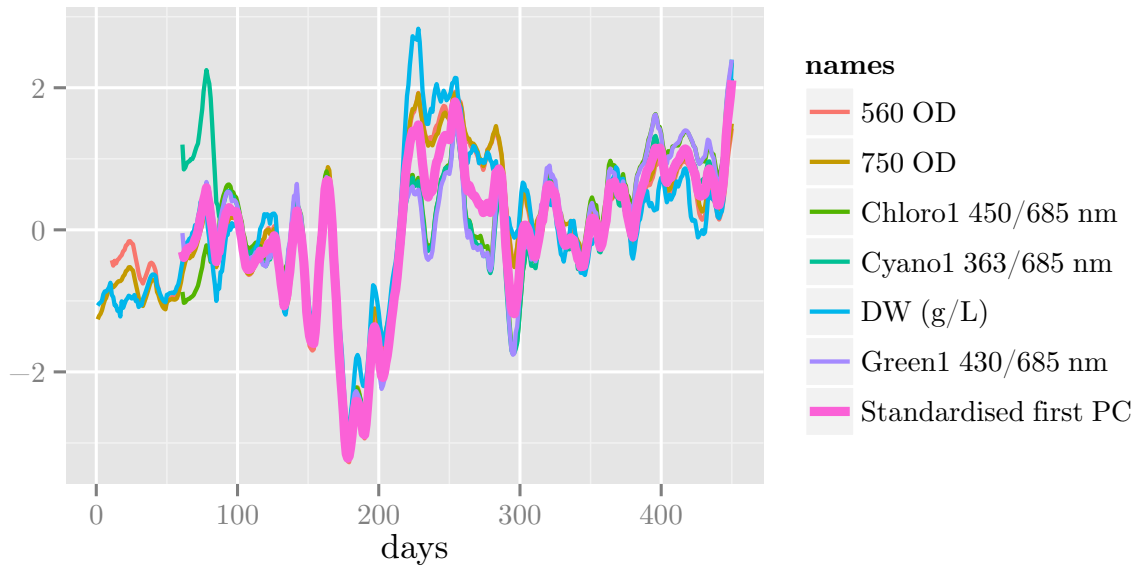

**Figure 21: Example highly correlated phenotypic variable cluster:** 7 phenotype variables (560 OD AVG, 750 OD AVG, DW g/L, Chloro1 450/685 nm AVG, Green1 430/685 nm AVG, KG, Cyano1 383/685 nm AVG) that mainly consist of various fluorescence levels and dry weight measures. Normalized variables, together with their first normalized principle component (dashed red), explaining 87.3% of the variance of the cluster.

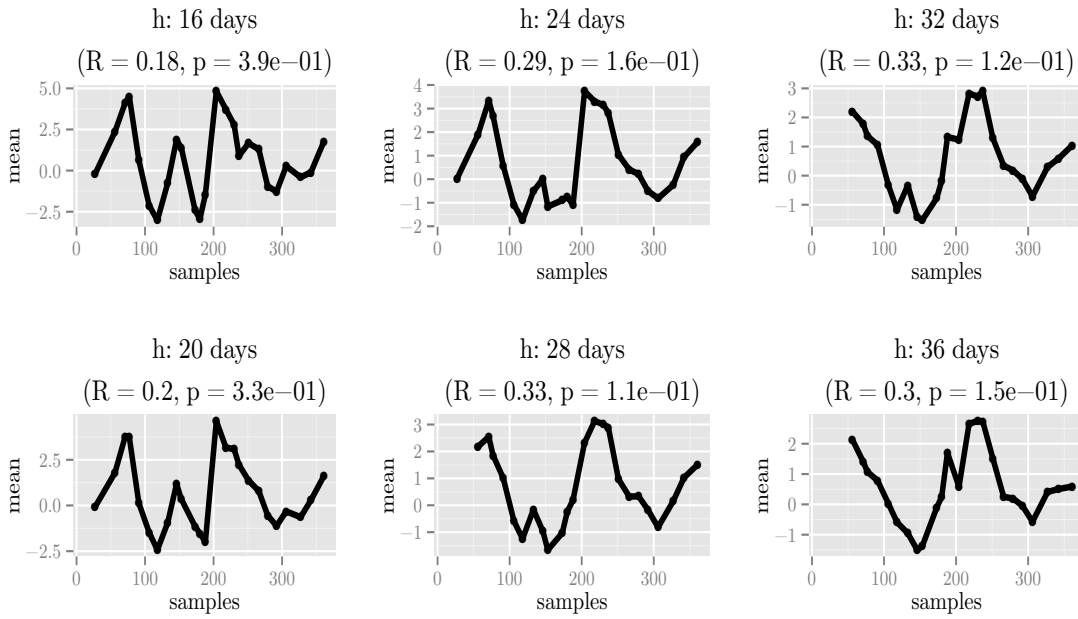

(a) Productivity mean for h:16-36 days

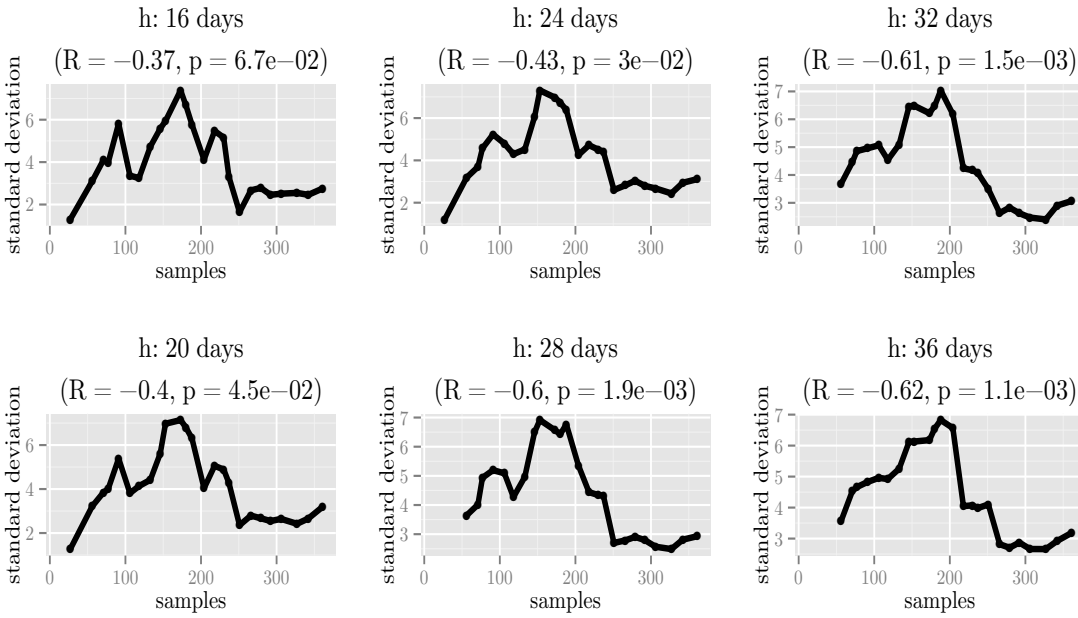

(b) Productivity standard deviation for h:16-36 days

**Figure 22:** Productivity statistics trends for various  $h$  (half window) sizes changing from 16 to 36 days.
